# Supplementary material for: Transcriptome and Proteome of Fish-Pathogenic Streptococcus agalactiae Are Modulated by Temperature
Source: Front Microbiol. 2018 Nov 2;9:2639. doi: 10.3389/fmicb.2018.02639 (PMC6224512; doi:10.3389/fmicb.2018.02639)
Supplement: Supplementary Table 2 — Complete list of transcripts identified by microarray analysis during GBS growth at 22°C and 32°C. [file Table_2.XLSX]

## Sheet: Table S2
Supplementary Table 2. Complete list of transcripts identified by microarray analysis during GBS growth at 22ºC and 32ºC.
ProbeName a	Accesion b	Number Passed c	[22](normalized) d	[32](normalized) d
CUST_1_PI430030029	SaSA53_0001	2	-0.108204	0.09656
CUST_2_PI430030029	SaSA53_0001	2	-0.115671	0.0646539
CUST_3_PI430030029	SaSA53_0002	2	-0.200438	0.359153
CUST_4_PI430030029	SaSA53_0002	2	-0.342234	0.195265
CUST_3308_PI430030029	SaSA53_0003	2	-0.00838868	0.112584
CUST_3309_PI430030029	SaSA53_0003	2	-0.0690155	0.0339098
CUST_2906_PI430030029	SaSA53_0004	2	0.0267741	0.109151
CUST_2907_PI430030029	SaSA53_0004	2	0.00634829	0.144258
CUST_5_PI430030029	SaSA53_0005	2	0.265186	-0.255815
CUST_6_PI430030029	SaSA53_0005	2	0.169666	-0.171714
CUST_7_PI430030029	SaSA53_0006	2	0.238014	-0.23576
CUST_8_PI430030029	SaSA53_0006	2	0.274979	-0.250612
CUST_10_PI430030029	SaSA53_0007	2	0.00354369	0.0678268
CUST_9_PI430030029	SaSA53_0007	2	0.182518	0.319564
CUST_11_PI430030029	SaSA53_0008	2	0.0785993	-0.0419118
CUST_12_PI430030029	SaSA53_0008	2	-0.0417143	-0.0753504
CUST_13_PI430030029	SaSA53_0009	2	0.209105	-0.0785484
CUST_14_PI430030029	SaSA53_0009	2	0.149043	-0.183489
CUST_15_PI430030029	SaSA53_0010	2	0.351945	-0.503794
CUST_16_PI430030029	SaSA53_0010	2	0.394835	-0.481913
CUST_17_PI430030029	SaSA53_0011	2	0.149702	-0.123302
CUST_18_PI430030029	SaSA53_0011	2	0.433082	0.101926
CUST_19_PI430030029	SaSA53_0012	2	-0.108216	-0.0121428
CUST_20_PI430030029	SaSA53_0012	2	-0.0748235	-0.00466617
CUST_2908_PI430030029	SaSA53_0013	2	0.0267089	0.0586805
CUST_2909_PI430030029	SaSA53_0013	2	0.125052	0.10965
CUST_2910_PI430030029	SaSA53_0014	2	-0.41173	0.464849
CUST_2911_PI430030029	SaSA53_0014	2	-0.45345	0.385272
CUST_2912_PI430030029	SaSA53_0015	2	-0.564827	0.468348
CUST_2913_PI430030029	SaSA53_0015	2	-0.505362	0.541344
CUST_3414_PI430030029	SaSA53_0015	2	-0.538206	0.430003
CUST_3415_PI430030029	SaSA53_0015	2	-0.460377	0.469057
CUST_26_PI430030029	SaSA53_0016	2	-0.515512	0.328284
CUST_27_PI430030029	SaSA53_0016	2	-0.500791	0.316452
CUST_3416_PI430030029	SaSA53_0017	2	-0.212051	0.526414
CUST_3417_PI430030029	SaSA53_0017	2	-0.407801	0.363661
CUST_28_PI430030029	SaSA53_0018	2	0.31918	-0.262727
CUST_29_PI430030029	SaSA53_0018	2	0.289376	-0.243443
CUST_3422_PI430030029	SaSA53_0019	1	0.803263	0.0872564
CUST_4427_PI430030029	SaSA53_0019	1	0.57377	2.38419e-07
CUST_2915_PI430030029	SaSA53_0020	2	0.523008	-0.30728
CUST_30_PI430030029	SaSA53_0022	2	-0.0130529	0.0401675
CUST_31_PI430030029	SaSA53_0022	2	0.0323483	0.0223684
CUST_3056_PI430030029	SaSA53_0023	2	-0.0559435	-0.0297972
CUST_3057_PI430030029	SaSA53_0023	2	-0.170689	-0.0630538
CUST_4429_PI430030029	SaSA53_0024	2	0.00543785	-0.0412547
CUST_4430_PI430030029	SaSA53_0024	2	0.0593883	-0.0492485
CUST_3428_PI430030029	SaSA53_0025	2	-0.202206	0.13799
CUST_3429_PI430030029	SaSA53_0025	2	-0.172005	0.184939
CUST_32_PI430030029	SaSA53_0026	2	-0.113236	0.180391
CUST_33_PI430030029	SaSA53_0026	2	-0.150185	0.120868
CUST_34_PI430030029	SaSA53_0027	2	-0.137074	-0.149755
CUST_35_PI430030029	SaSA53_0027	2	-0.0004975	-0.0598005
CUST_36_PI430030029	SaSA53_0028	2	-0.408944	0.2393
CUST_37_PI430030029	SaSA53_0028	2	-0.28119	0.275866
CUST_38_PI430030029	SaSA53_0029	2	0.171801	-0.186529
CUST_39_PI430030029	SaSA53_0029	2	0.131651	-0.212331
CUST_40_PI430030029	SaSA53_0030	2	0.295879	-0.208379
CUST_41_PI430030029	SaSA53_0030	2	0.367668	-0.170904
CUST_42_PI430030029	SaSA53_0031	2	0.248676	-0.303528
CUST_43_PI430030029	SaSA53_0031	2	0.387973	-0.210889
CUST_44_PI430030029	SaSA53_0032	2	0.155169	-0.133086
CUST_45_PI430030029	SaSA53_0032	2	0.052858	-0.332993
CUST_46_PI430030029	SaSA53_0033	2	-0.0653982	-0.0641473
CUST_47_PI430030029	SaSA53_0033	2	0.0306602	0.041828
CUST_48_PI430030029	SaSA53_0034	2	0.0736041	-0.0488086
CUST_49_PI430030029	SaSA53_0034	2	0.0554201	-0.0492845
CUST_50_PI430030029	SaSA53_0035	2	-0.310549	0.351173
CUST_51_PI430030029	SaSA53_0035	2	-0.32515	0.456613
CUST_52_PI430030029	SaSA53_0036	2	-0.421457	0.371486
CUST_53_PI430030029	SaSA53_0036	2	-0.333542	0.409143
CUST_3432_PI430030029	SaSA53_0040	1	0.235701	0.160577
CUST_16_PI430029661	SaSA53_0041	2	0.0970483	-0.0908519
CUST_17_PI430029661	SaSA53_0041	2	0.12991	-0.115329
CUST_18_PI430029661	SaSA53_0041	2	0.223237	-0.132804
CUST_54_PI430030029	SaSA53_0041	2	0.0905776	-0.0869387
CUST_55_PI430030029	SaSA53_0041	2	0.0821236	-0.143073
CUST_56_PI430030029	SaSA53_0042	2	0.0773781	0.0439973
CUST_57_PI430030029	SaSA53_0042	2	-0.0384773	-0.129713
CUST_58_PI430030029	SaSA53_0043	2	-0.0353951	0.0375447
CUST_59_PI430030029	SaSA53_0043	2	-0.0176282	0.0125279
CUST_3434_PI430030029	SaSA53_0044	2	-0.247574	0.203046
CUST_3435_PI430030029	SaSA53_0044	2	-0.186438	0.181464
CUST_60_PI430030029	SaSA53_0045	2	-0.366014	0.443513
CUST_61_PI430030029	SaSA53_0045	2	-0.303307	0.278311
CUST_62_PI430030029	SaSA53_0046	2	0.0653804	-0.0251455
CUST_63_PI430030029	SaSA53_0046	2	0.145015	0.0111987
CUST_64_PI430030029	SaSA53_0047	2	0.0945249	0.320676
CUST_65_PI430030029	SaSA53_0047	2	-0.116325	-0.00536521
CUST_66_PI430030029	SaSA53_0048	2	0.169443	-0.137955
CUST_67_PI430030029	SaSA53_0048	2	0.301686	-0.11103
CUST_68_PI430030029	SaSA53_0049	2	0.236839	-0.259267
CUST_69_PI430030029	SaSA53_0049	2	0.176559	-0.308465
CUST_70_PI430030029	SaSA53_0050	2	0.0550826	-0.0779909
CUST_71_PI430030029	SaSA53_0050	2	0.118018	-0.0477997
CUST_72_PI430030029	SaSA53_0051	2	0.111454	-0.087928
CUST_73_PI430030029	SaSA53_0051	2	0.0357038	-0.0617722
CUST_74_PI430030029	SaSA53_0052	2	-0.0765093	0.287988
CUST_75_PI430030029	SaSA53_0052	2	0.25037	0.180769
CUST_76_PI430030029	SaSA53_0053	2	-0.132535	0.239167
CUST_77_PI430030029	SaSA53_0053	2	-0.172591	0.140708
CUST_78_PI430030029	SaSA53_0054	2	-0.199684	0.323924
CUST_79_PI430030029	SaSA53_0054	2	-0.195521	0.463919
CUST_80_PI430030029	SaSA53_0055	2	-0.236052	0.30693
CUST_81_PI430030029	SaSA53_0055	2	-0.188178	0.273236
CUST_82_PI430030029	SaSA53_0056	2	-0.14989	0.260459
CUST_83_PI430030029	SaSA53_0056	2	-0.227834	0.261729
CUST_84_PI430030029	SaSA53_0057	2	-0.167462	0.270219
CUST_85_PI430030029	SaSA53_0057	2	-0.113944	0.317756
CUST_86_PI430030029	SaSA53_0058	2	-0.0547142	-0.241581
CUST_87_PI430030029	SaSA53_0058	2	-0.0396991	-0.262492
CUST_88_PI430030029	SaSA53_0059	2	0.0945168	0.107856
CUST_89_PI430030029	SaSA53_0059	2	0.08266	-0.0386527
CUST_3062_PI430030029	SaSA53_0060	2	-0.015992	-0.0696155
CUST_3063_PI430030029	SaSA53_0060	2	-0.0366759	0.128003
CUST_90_PI430030029	SaSA53_0060	2	0.0483289	0.0809979
CUST_91_PI430030029	SaSA53_0060	2	0.0302375	0.0430535
CUST_3437_PI430030029	SaSA53_0061	2	0.11067	-0.0544092
CUST_92_PI430030029	SaSA53_0062	2	-0.0620944	-0.175986
CUST_93_PI430030029	SaSA53_0062	2	0.0879539	-0.126079
CUST_94_PI430030029	SaSA53_0063	2	0.123963	-0.0448066
CUST_95_PI430030029	SaSA53_0063	2	0.108211	-0.0637172
CUST_96_PI430030029	SaSA53_0064	2	0.107109	-0.292381
CUST_97_PI430030029	SaSA53_0064	2	0.237102	-0.0535703
CUST_98_PI430030029	SaSA53_0065	2	0.110339	-0.137891
CUST_99_PI430030029	SaSA53_0065	2	-0.00128826	-0.219794
CUST_100_PI430030029	SaSA53_0066	2	-0.0179644	0.22062
CUST_101_PI430030029	SaSA53_0066	2	-0.00490745	0.141212
CUST_3438_PI430030029	SaSA53_0066	2	-0.0837563	0.205389
CUST_3439_PI430030029	SaSA53_0066	2	-0.0369595	0.0609911
CUST_102_PI430030029	SaSA53_0067	2	-0.14303	0.215496
CUST_103_PI430030029	SaSA53_0067	2	-0.0985497	0.143531
CUST_104_PI430030029	SaSA53_0068	2	0.22532	-0.261597
CUST_105_PI430030029	SaSA53_0068	2	0.136943	-0.280544
CUST_106_PI430030029	SaSA53_0069	2	0.091205	-0.021526
CUST_107_PI430030029	SaSA53_0069	2	0.0810692	-0.0702275
CUST_3064_PI430030029	SaSA53_0071	2	-0.038187	0.081996
CUST_3065_PI430030029	SaSA53_0071	2	-0.0944155	0.0465191
CUST_2916_PI430030029	SaSA53_0072	2	-0.157363	-0.0808899
CUST_2917_PI430030029	SaSA53_0072	2	-0.109601	-0.0505993
CUST_3066_PI430030029	SaSA53_0073	2	-0.0667825	0.0792836
CUST_3067_PI430030029	SaSA53_0073	2	-0.0308919	-0.016576
CUST_108_PI430030029	SaSA53_0074	2	-0.170776	0.232628
CUST_109_PI430030029	SaSA53_0074	2	-0.124126	0.198116
CUST_110_PI430030029	SaSA53_0075	2	0.26315	-0.214358
CUST_111_PI430030029	SaSA53_0075	2	0.209691	-0.222207
CUST_112_PI430030029	SaSA53_0076	2	0.288369	0.0657501
CUST_113_PI430030029	SaSA53_0076	2	0.107038	-0.218295
CUST_114_PI430030029	SaSA53_0077	2	-0.251947	0.101833
CUST_115_PI430030029	SaSA53_0077	2	-0.16637	0.120475
CUST_4431_PI430030029	SaSA53_0078	2	-0.0963944	0.426862
CUST_4432_PI430030029	SaSA53_0078	2	-0.236174	0.338722
CUST_116_PI430030029	SaSA53_0079	2	-0.0696155	0.266711
CUST_117_PI430030029	SaSA53_0079	2	-0.107005	0.249573
CUST_118_PI430030029	SaSA53_0080	2	-0.145601	-0.143153
CUST_119_PI430030029	SaSA53_0080	2	0.0137587	0.0221157
CUST_120_PI430030029	SaSA53_0081	2	-0.207295	0.129704
CUST_121_PI430030029	SaSA53_0081	2	-0.195007	0.105685
CUST_122_PI430030029	SaSA53_0082	2	-0.129511	0.0518545
CUST_123_PI430030029	SaSA53_0082	2	-0.0752765	0.137236
CUST_124_PI430030029	SaSA53_0083	2	0.121164	0.0601201
CUST_125_PI430030029	SaSA53_0083	2	-0.0760886	-0.045831
CUST_126_PI430030029	SaSA53_0084	2	0.0569094	-0.0406896
CUST_127_PI430030029	SaSA53_0084	2	-0.0313643	-0.178312
CUST_128_PI430030029	SaSA53_0085	2	0.0331481	0.0270141
CUST_129_PI430030029	SaSA53_0085	2	0.00662152	-0.00520754
CUST_130_PI430030029	SaSA53_0086	2	-0.155504	0.248669
CUST_131_PI430030029	SaSA53_0086	2	-0.102926	0.115066
CUST_3068_PI430030029	SaSA53_0087	2	-0.0820573	0.332998
CUST_3069_PI430030029	SaSA53_0087	2	-0.0874755	-0.0239739
CUST_132_PI430030029	SaSA53_0088	2	-0.147602	-0.02553
CUST_133_PI430030029	SaSA53_0088	2	-0.178513	-0.0593252
CUST_134_PI430030029	SaSA53_0089	2	-0.166853	0.154084
CUST_135_PI430030029	SaSA53_0089	2	-0.142323	0.27855
CUST_136_PI430030029	SaSA53_0090	2	-1.15148	1.53557
CUST_137_PI430030029	SaSA53_0090	2	-1.08642	1.40458
CUST_138_PI430030029	SaSA53_0091	2	-1.33384	1.22191
CUST_139_PI430030029	SaSA53_0091	2	-1.21176	1.63142
CUST_3444_PI430030029	SaSA53_0092	2	-1.23753	1.57051
CUST_3446_PI430030029	SaSA53_0093	2	-0.0709753	0.0340261
CUST_3447_PI430030029	SaSA53_0093	2	0.033816	-0.0261475
CUST_140_PI430030029	SaSA53_0094	2	0.392182	-0.417413
CUST_141_PI430030029	SaSA53_0094	2	0.293341	-0.528315
CUST_142_PI430030029	SaSA53_0095	2	-0.58723	0.430489
CUST_143_PI430030029	SaSA53_0095	2	-0.108265	0.148361
CUST_144_PI430030029	SaSA53_0096	2	-0.472056	0.455904
CUST_145_PI430030029	SaSA53_0096	2	-0.123488	0.0563726
CUST_3070_PI430030029	SaSA53_0097	2	-0.308315	0.35073
CUST_3071_PI430030029	SaSA53_0097	2	-0.399725	0.296801
CUST_147_PI430030029	SaSA53_0098	2	0.55869	-0.802797
CUST_148_PI430030029	SaSA53_0098	2	0.635537	-0.705423
CUST_149_PI430030029	SaSA53_0099	2	-0.272471	0.261515
CUST_150_PI430030029	SaSA53_0099	2	-0.0494706	0.150105
CUST_151_PI430030029	SaSA53_0100	2	-0.662811	1.01668
CUST_152_PI430030029	SaSA53_0100	2	-0.694759	0.84355
CUST_153_PI430030029	SaSA53_0101	2	-0.238811	0.300754
CUST_154_PI430030029	SaSA53_0101	2	-0.201541	0.319461
CUST_155_PI430030029	SaSA53_0102	2	-0.27589	0.248016
CUST_156_PI430030029	SaSA53_0102	2	-0.10293	0.364494
CUST_157_PI430030029	SaSA53_0103	2	-0.233321	0.149195
CUST_158_PI430030029	SaSA53_0103	2	-0.130369	0.241624
CUST_159_PI430030029	SaSA53_0104	2	-0.459851	0.592677
CUST_160_PI430030029	SaSA53_0104	2	-0.487942	0.495456
CUST_161_PI430030029	SaSA53_0105	2	-0.503254	0.628974
CUST_162_PI430030029	SaSA53_0105	2	-0.456124	0.603216
CUST_163_PI430030029	SaSA53_0106	2	-0.363215	0.496266
CUST_164_PI430030029	SaSA53_0106	2	-0.356777	0.493104
CUST_165_PI430030029	SaSA53_0107	2	-0.204999	0.318332
CUST_166_PI430030029	SaSA53_0107	2	-0.234233	0.321615
CUST_167_PI430030029	SaSA53_0108	2	-0.288141	0.306152
CUST_168_PI430030029	SaSA53_0108	2	-0.196498	0.340759
CUST_169_PI430030029	SaSA53_0109	2	-0.202529	0.473018
CUST_170_PI430030029	SaSA53_0109	2	-0.266748	0.406096
CUST_171_PI430030029	SaSA53_0110	2	-0.248279	0.303311
CUST_172_PI430030029	SaSA53_0110	2	-0.305175	0.293907
CUST_173_PI430030029	SaSA53_0111	2	-0.272698	0.298984
CUST_174_PI430030029	SaSA53_0111	2	-0.262536	0.34689
CUST_175_PI430030029	SaSA53_0112	2	-0.376689	0.351241
CUST_176_PI430030029	SaSA53_0112	2	-0.305336	0.33684
CUST_3448_PI430030029	SaSA53_0113	2	-0.365649	0.450348
CUST_3449_PI430030029	SaSA53_0113	2	-0.37801	0.33015
CUST_177_PI430030029	SaSA53_0114	2	0.0713255	0.0775005
CUST_178_PI430030029	SaSA53_0114	2	-0.0384474	-0.0349922
CUST_3450_PI430030029	SaSA53_0115	2	-0.114998	0.163707
CUST_3451_PI430030029	SaSA53_0115	2	-0.274329	0.0185153
CUST_179_PI430030029	SaSA53_0116	2	-0.469719	0.24618
CUST_180_PI430030029	SaSA53_0116	2	-0.197901	0.419006
CUST_181_PI430030029	SaSA53_0117	2	0.0390835	-0.0972398
CUST_182_PI430030029	SaSA53_0117	2	0.142636	-0.226427
CUST_183_PI430030029	SaSA53_0118	2	0.296299	-0.34947
CUST_184_PI430030029	SaSA53_0118	2	0.395848	-0.304302
CUST_185_PI430030029	SaSA53_0119	2	0.296624	-0.372542
CUST_186_PI430030029	SaSA53_0119	2	0.308474	-0.368429
CUST_2918_PI430030029	SaSA53_0120	2	0.0837752	-0.156158
CUST_2919_PI430030029	SaSA53_0120	2	0.190805	-0.0949049
CUST_187_PI430030029	SaSA53_0121	2	0.0565769	-0.255255
CUST_188_PI430030029	SaSA53_0121	2	0.0426412	-0.215638
CUST_189_PI430030029	SaSA53_0122	2	0.0142147	0.0611501
CUST_190_PI430030029	SaSA53_0122	2	0.0719086	0.0788301
CUST_191_PI430030029	SaSA53_0123	2	-0.0281787	0.136956
CUST_192_PI430030029	SaSA53_0123	2	-0.120638	0.0239693
CUST_3072_PI430030029	SaSA53_0124	2	0.313645	-0.353092
CUST_3073_PI430030029	SaSA53_0124	2	0.330892	-0.345458
CUST_193_PI430030029	SaSA53_0125	2	0.20206	-0.439502
CUST_194_PI430030029	SaSA53_0125	2	0.36954	-0.290837
CUST_3452_PI430030029	SaSA53_0127	2	0.033318	0.0187252
CUST_3453_PI430030029	SaSA53_0127	2	0.0866129	0.0689459
CUST_195_PI430030029	SaSA53_0128	2	-0.116976	0.0403369
CUST_196_PI430030029	SaSA53_0128	2	-0.12347	-0.125314
CUST_3455_PI430030029	SaSA53_0129	2	-0.33812	0.193078
CUST_197_PI430030029	SaSA53_0130	2	0.303181	-0.295581
CUST_198_PI430030029	SaSA53_0130	2	0.371544	-0.277585
CUST_199_PI430030029	SaSA53_0131	2	0.363428	-0.378738
CUST_200_PI430030029	SaSA53_0131	2	0.344773	-0.516354
CUST_201_PI430030029	SaSA53_0132	2	0.164138	-0.131301
CUST_202_PI430030029	SaSA53_0132	2	0.128847	-0.247273
CUST_203_PI430030029	SaSA53_0133	2	0.451413	-0.341907
CUST_204_PI430030029	SaSA53_0133	2	0.268871	-0.311882
CUST_205_PI430030029	SaSA53_0134	2	-0.109308	0.105647
CUST_206_PI430030029	SaSA53_0134	2	-0.054543	0.0728545
CUST_207_PI430030029	SaSA53_0135	2	-0.00677999	0.0266056
CUST_208_PI430030029	SaSA53_0135	2	-0.00845305	0.0400343
CUST_209_PI430030029	SaSA53_0136	2	2.20935e-05	0.0584645
CUST_210_PI430030029	SaSA53_0136	2	-0.0023783	0.0372259
CUST_211_PI430030029	SaSA53_0137	2	-0.073168	-0.0413718
CUST_212_PI430030029	SaSA53_0137	2	0.0743815	0.0205062
CUST_213_PI430030029	SaSA53_0138	2	-0.18184	0.285122
CUST_214_PI430030029	SaSA53_0138	2	-0.131568	0.253188
CUST_215_PI430030029	SaSA53_0139	2	-0.248301	0.60764
CUST_216_PI430030029	SaSA53_0139	2	-0.272957	0.567705
CUST_217_PI430030029	SaSA53_0140	2	0.0686205	-0.274057
CUST_218_PI430030029	SaSA53_0140	2	0.361107	-0.0709538
CUST_219_PI430030029	SaSA53_0141	2	-0.200852	0.147767
CUST_220_PI430030029	SaSA53_0141	2	-0.0738158	0.120065
CUST_221_PI430030029	SaSA53_0142	2	-0.0136921	-0.0220672
CUST_222_PI430030029	SaSA53_0142	2	-0.109154	-0.165583
CUST_223_PI430030029	SaSA53_0143	2	-0.0898183	0.010225
CUST_224_PI430030029	SaSA53_0143	2	-0.069324	-0.0066673
CUST_225_PI430030029	SaSA53_0144	2	0.0856055	-0.14619
CUST_226_PI430030029	SaSA53_0144	2	0.297603	-0.0556356
CUST_3459_PI430030029	SaSA53_0145	2	-0.0209797	0.0300527
CUST_3460_PI430030029	SaSA53_0145	2	0.307769	-0.0415281
CUST_227_PI430030029	SaSA53_0146	2	-0.0344429	-0.15102
CUST_228_PI430030029	SaSA53_0146	2	0.0642064	-0.035202
CUST_229_PI430030029	SaSA53_0147	2	-0.0295126	0.0828465
CUST_230_PI430030029	SaSA53_0147	2	-0.140077	-0.0975126
CUST_231_PI430030029	SaSA53_0148	2	-0.0883993	0.0408646
CUST_232_PI430030029	SaSA53_0148	2	-0.0327182	-0.0285891
CUST_233_PI430030029	SaSA53_0149	2	-0.150256	0.036541
CUST_234_PI430030029	SaSA53_0149	1	0.664975	-0.0328884
CUST_235_PI430030029	SaSA53_0150	2	-0.346461	-0.0750488
CUST_236_PI430030029	SaSA53_0150	2	-0.147356	0.196871
CUST_237_PI430030029	SaSA53_0151	2	0.133876	-0.119627
CUST_238_PI430030029	SaSA53_0151	2	0.177714	-0.316154
CUST_239_PI430030029	SaSA53_0152	2	0.0569844	-0.100165
CUST_240_PI430030029	SaSA53_0152	2	0.044466	-0.0163606
CUST_241_PI430030029	SaSA53_0153	2	0.0862095	-0.115697
CUST_242_PI430030029	SaSA53_0153	2	0.107474	-0.144116
CUST_243_PI430030029	SaSA53_0154	2	0.0879623	-0.0825553
CUST_244_PI430030029	SaSA53_0154	2	0.123195	-0.0753622
CUST_245_PI430030029	SaSA53_0155	2	0.213599	0.233678
CUST_246_PI430030029	SaSA53_0155	2	0.0332866	-0.0375098
CUST_247_PI430030029	SaSA53_0156	2	-0.0668077	0.0408872
CUST_248_PI430030029	SaSA53_0156	2	-0.0304844	-0.0885189
CUST_249_PI430030029	SaSA53_0157	2	-0.163102	0.104599
CUST_250_PI430030029	SaSA53_0157	2	-0.110439	0.204298
CUST_251_PI430030029	SaSA53_0158	2	-0.164463	-0.019753
CUST_252_PI430030029	SaSA53_0158	2	-0.130118	0.0860149
CUST_253_PI430030029	SaSA53_0159	2	-0.0959922	0.333357
CUST_254_PI430030029	SaSA53_0159	2	-0.161601	0.3275
CUST_255_PI430030029	SaSA53_0160	2	-0.213317	0.293728
CUST_256_PI430030029	SaSA53_0160	2	-0.0881559	0.287096
CUST_257_PI430030029	SaSA53_0161	2	-0.00675567	0.0644711
CUST_258_PI430030029	SaSA53_0161	2	-0.137657	0.0109005
CUST_259_PI430030029	SaSA53_0162	2	-0.00763162	-0.121926
CUST_260_PI430030029	SaSA53_0162	2	0.0156574	-0.076383
CUST_4650_PI430030029	SaSA53_0163	2	0.12514	-0.214785
CUST_4651_PI430030029	SaSA53_0163	2	0.348789	-0.160973
CUST_261_PI430030029	SaSA53_0164	2	0.180923	-0.186851
CUST_262_PI430030029	SaSA53_0164	2	0.268309	-0.257652
CUST_3311_PI430030029	SaSA53_0165	2	-0.0108045	-0.0137695
CUST_3312_PI430030029	SaSA53_0165	2	0.0163517	0.00696405
CUST_4593_PI430030029	SaSA53_0165	2	0.0160095	0.00426277
CUST_271_PI430030029	SaSA53_0166	2	-0.106183	0.08884
CUST_272_PI430030029	SaSA53_0166	2	-0.119938	0.028968
CUST_3313_PI430030029	SaSA53_0167	2	0.010033	-0.0248226
CUST_3314_PI430030029	SaSA53_0167	2	0.0591523	-0.0147902
CUST_273_PI430030029	SaSA53_0168	2	0.0161455	0.021242
CUST_274_PI430030029	SaSA53_0168	2	0.0504502	-0.00229629
CUST_3083_PI430030029	SaSA53_0171	2	-0.435662	0.360156
CUST_3084_PI430030029	SaSA53_0171	2	-0.228947	0.407816
CUST_275_PI430030029	SaSA53_0172	2	0.146595	-0.164061
CUST_276_PI430030029	SaSA53_0172	2	0.107547	-0.177816
CUST_277_PI430030029	SaSA53_0173	2	0.0755304	-0.1619
CUST_278_PI430030029	SaSA53_0173	2	0.141984	-0.106424
CUST_279_PI430030029	SaSA53_0175	2	0.663212	-0.523294
CUST_280_PI430030029	SaSA53_0175	2	0.686661	-0.526456
CUST_281_PI430030029	SaSA53_0176	2	0.291672	-0.541215
CUST_282_PI430030029	SaSA53_0176	2	0.347575	-0.503598
CUST_283_PI430030029	SaSA53_0177	2	0.558733	-0.500807
CUST_284_PI430030029	SaSA53_0177	2	0.591167	-0.517464
CUST_3318_PI430030029	SaSA53_0178	2	0.507925	-0.40406
CUST_285_PI430030029	SaSA53_0179	2	0.415497	-0.376928
CUST_286_PI430030029	SaSA53_0179	2	0.371721	-0.497294
CUST_287_PI430030029	SaSA53_0180	2	0.354686	-0.395637
CUST_288_PI430030029	SaSA53_0180	2	0.616851	-0.394162
CUST_289_PI430030029	SaSA53_0181	2	-0.29708	0.660102
CUST_290_PI430030029	SaSA53_0181	2	-0.352172	0.587892
CUST_291_PI430030029	SaSA53_0182	2	-0.0714711	-0.0116127
CUST_292_PI430030029	SaSA53_0182	2	-0.102724	-0.133387
CUST_293_PI430030029	SaSA53_0183	2	-0.0680908	0.151761
CUST_294_PI430030029	SaSA53_0183	2	0.156048	0.334854
CUST_295_PI430030029	SaSA53_0184	2	-0.36668	0.422108
CUST_296_PI430030029	SaSA53_0184	2	-0.375458	0.225237
CUST_3319_PI430030029	SaSA53_0186	1	0.115393	0.229727
CUST_3320_PI430030029	SaSA53_0186	2	-0.3308	0.330493
CUST_297_PI430030029	SaSA53_0187	2	-0.100579	0.0940339
CUST_298_PI430030029	SaSA53_0187	2	-0.313628	0.201545
CUST_301_PI430030029	SaSA53_0189	2	-0.476222	0.351092
CUST_302_PI430030029	SaSA53_0189	2	-0.091599	0.150675
CUST_303_PI430030029	SaSA53_0190	2	0.182764	0.0442053
CUST_304_PI430030029	SaSA53_0190	1	-0.241292	0.254707
CUST_305_PI430030029	SaSA53_0191	2	-0.261314	0.234299
CUST_306_PI430030029	SaSA53_0191	2	-0.212142	0.296752
CUST_307_PI430030029	SaSA53_0193	2	-0.462752	0.213232
CUST_308_PI430030029	SaSA53_0193	2	-0.389535	0.277623
CUST_309_PI430030029	SaSA53_0194	2	0.510883	-0.593711
CUST_310_PI430030029	SaSA53_0194	2	0.596943	-0.766028
CUST_3323_PI430030029	SaSA53_0195	2	0.461137	-0.537874
CUST_3324_PI430030029	SaSA53_0195	2	0.277292	-0.604263
CUST_3326_PI430030029	SaSA53_0196	2	0.636383	-0.437936
CUST_311_PI430030029	SaSA53_0197	2	0.380261	-0.486476
CUST_312_PI430030029	SaSA53_0197	2	0.474234	-0.409955
CUST_313_PI430030029	SaSA53_0198	2	0.358099	-0.419595
CUST_314_PI430030029	SaSA53_0199	2	0.334613	-0.332842
CUST_315_PI430030029	SaSA53_0199	2	0.38351	-0.336275
CUST_316_PI430030029	SaSA53_0200	2	0.398413	-0.286008
CUST_317_PI430030029	SaSA53_0200	2	0.378839	-0.300511
CUST_318_PI430030029	SaSA53_0201	2	0.145902	-0.149898
CUST_319_PI430030029	SaSA53_0201	2	0.108212	-0.25378
CUST_320_PI430030029	SaSA53_0202	2	0.152653	-0.158711
CUST_321_PI430030029	SaSA53_0202	2	0.255198	-0.0832157
CUST_322_PI430030029	SaSA53_0203	2	0.0840012	-0.0822671
CUST_323_PI430030029	SaSA53_0203	2	-0.0474806	-0.190118
CUST_324_PI430030029	SaSA53_0204	2	0.172937	0.163672
CUST_325_PI430030029	SaSA53_0204	2	-0.151948	-0.165617
CUST_326_PI430030029	SaSA53_0205	2	0.149841	0.369789
CUST_327_PI430030029	SaSA53_0205	2	-0.139588	0.110484
CUST_328_PI430030029	SaSA53_0206	2	-0.284539	0.345255
CUST_329_PI430030029	SaSA53_0206	2	-0.246336	0.371609
CUST_2_PI430029661	SaSA53_0207	2	0.130948	-0.11569
CUST_3_PI430029661	SaSA53_0207	2	-0.0907973	0.0958277
CUST_331_PI430030029	SaSA53_0207	2	0.116267	-0.203125
CUST_332_PI430030029	SaSA53_0208	2	0.0924761	-0.156242
CUST_333_PI430030029	SaSA53_0208	2	0.0220405	-0.28698
CUST_4652_PI430030029	SaSA53_0209	2	0.0747282	0.159783
CUST_4653_PI430030029	SaSA53_0209	2	0.198222	0.266755
CUST_334_PI430030029	SaSA53_0210	2	-0.0313883	0.0144215
CUST_335_PI430030029	SaSA53_0210	2	-0.0470413	0.0196273
CUST_336_PI430030029	SaSA53_0211	2	-0.0622177	-0.0209182
CUST_337_PI430030029	SaSA53_0211	2	0.0106818	0.105432
CUST_338_PI430030029	SaSA53_0212	2	-0.0203087	0.0574835
CUST_339_PI430030029	SaSA53_0212	2	-0.102993	-0.0963009
CUST_340_PI430030029	SaSA53_0213	2	0.0296545	-0.114039
CUST_341_PI430030029	SaSA53_0213	2	-0.0616997	0.026594
CUST_342_PI430030029	SaSA53_0214	2	-0.077295	-0.0473553
CUST_343_PI430030029	SaSA53_0214	2	-0.0551085	-0.00704114
CUST_344_PI430030029	SaSA53_0215	2	-0.13118	-0.0890816
CUST_345_PI430030029	SaSA53_0215	2	0.00396268	-0.0406505
CUST_346_PI430030029	SaSA53_0216	2	-0.112587	0.0446579
CUST_347_PI430030029	SaSA53_0216	2	0.000625769	0.0522132
CUST_4600_PI430030029	SaSA53_0217	2	0.0217058	0.118809
CUST_4601_PI430030029	SaSA53_0217	2	0.0172604	0.0968337
CUST_348_PI430030029	SaSA53_0218	2	-0.0369453	0.129597
CUST_349_PI430030029	SaSA53_0218	2	0.0538851	0.0534999
CUST_350_PI430030029	SaSA53_0219	2	-0.0713697	0.0026927
CUST_351_PI430030029	SaSA53_0219	2	-0.0454275	-0.0334484
CUST_352_PI430030029	SaSA53_0220	2	-0.0347133	0.000838757
CUST_353_PI430030029	SaSA53_0220	2	0.0657438	0.0664396
CUST_354_PI430030029	SaSA53_0221	2	-0.0542933	0.00928783
CUST_355_PI430030029	SaSA53_0221	2	-0.113211	0.0218789
CUST_357_PI430030029	SaSA53_0222	2	0.0361423	0.0795018
CUST_358_PI430030029	SaSA53_0223	2	-0.0382242	0.0663074
CUST_359_PI430030029	SaSA53_0223	2	-0.0388603	0.0637039
CUST_360_PI430030029	SaSA53_0224	2	-0.0697417	-0.124326
CUST_361_PI430030029	SaSA53_0224	2	-0.125877	-0.193268
CUST_362_PI430030029	SaSA53_0225	2	-0.0185555	0.0301954
CUST_363_PI430030029	SaSA53_0225	2	-0.0459096	-0.0175454
CUST_364_PI430030029	SaSA53_0226	2	-0.140369	-0.111498
CUST_365_PI430030029	SaSA53_0226	2	-0.106739	-0.121542
CUST_366_PI430030029	SaSA53_0227	2	-0.149669	-0.0694944
CUST_367_PI430030029	SaSA53_0227	2	-0.0807122	-0.0515113
CUST_368_PI430030029	SaSA53_0228	2	-0.0934884	-0.0319443
CUST_369_PI430030029	SaSA53_0228	2	-0.164458	-0.0457236
CUST_370_PI430030029	SaSA53_0229	2	-0.0350552	0.0687367
CUST_371_PI430030029	SaSA53_0229	2	-0.0723769	-0.0178518
CUST_372_PI430030029	SaSA53_0230	2	-0.0965468	0.0275977
CUST_373_PI430030029	SaSA53_0230	2	-0.0262718	0.126703
CUST_374_PI430030029	SaSA53_0231	2	0.0584642	0.129761
CUST_375_PI430030029	SaSA53_0231	2	-0.0877943	0.210754
CUST_376_PI430030029	SaSA53_0232	2	-0.0122884	0.00578435
CUST_377_PI430030029	SaSA53_0232	2	-0.01612	-0.0258325
CUST_378_PI430030029	SaSA53_0233	2	-0.0846504	-0.133113
CUST_379_PI430030029	SaSA53_0233	2	0.0029033	-0.0441771
CUST_380_PI430030029	SaSA53_0234	2	-0.106998	-0.117402
CUST_381_PI430030029	SaSA53_0235	2	-0.0697511	-0.0843471
CUST_382_PI430030029	SaSA53_0235	2	-0.0915758	-0.0574244
CUST_383_PI430030029	SaSA53_0236	2	-0.196289	-0.240725
CUST_384_PI430030029	SaSA53_0236	2	-0.0929507	-0.204168
CUST_385_PI430030029	SaSA53_0237	2	0.0104435	-0.0338155
CUST_386_PI430030029	SaSA53_0237	2	0.359904	0.296426
CUST_387_PI430030029	SaSA53_0238	2	0.0117922	-0.247944
CUST_388_PI430030029	SaSA53_0238	2	0.0618709	-0.20504
CUST_3369_PI430030029	SaSA53_0239	2	0.199124	-0.235124
CUST_3370_PI430030029	SaSA53_0239	2	0.257876	-0.230675
CUST_389_PI430030029	SaSA53_0240	2	0.145555	-0.325318
CUST_390_PI430030029	SaSA53_0240	2	0.184212	-0.306679
CUST_391_PI430030029	SaSA53_0241	2	-0.105716	-0.0400662
CUST_392_PI430030029	SaSA53_0241	2	-0.089292	0.00509342
CUST_393_PI430030029	SaSA53_0242	2	-0.429706	0.136672
CUST_394_PI430030029	SaSA53_0242	2	-0.378258	0.161408
CUST_395_PI430030029	SaSA53_0243	2	0.0915241	-0.183533
CUST_396_PI430030029	SaSA53_0243	2	0.160792	-0.0720024
CUST_3091_PI430030029	SaSA53_0244	2	-0.0441051	0.1373
CUST_3092_PI430030029	SaSA53_0244	2	-0.0400232	0.0864201
CUST_397_PI430030029	SaSA53_0245	2	0.162474	-0.139281
CUST_398_PI430030029	SaSA53_0245	2	0.134481	-0.0791272
CUST_399_PI430030029	SaSA53_0246	2	0.081977	0.18809
CUST_400_PI430030029	SaSA53_0246	2	0.0173438	0.10327
CUST_401_PI430030029	SaSA53_0247	2	-0.423669	0.435285
CUST_402_PI430030029	SaSA53_0247	2	-0.291512	0.284559
CUST_403_PI430030029	SaSA53_0248	2	-0.634171	0.549215
CUST_404_PI430030029	SaSA53_0249	2	-0.382838	0.33075
CUST_405_PI430030029	SaSA53_0249	2	-0.39448	0.306879
CUST_406_PI430030029	SaSA53_0250	2	-0.0601171	-0.0205312
CUST_407_PI430030029	SaSA53_0250	2	-0.193317	0.167105
CUST_408_PI430030029	SaSA53_0251	2	-0.386486	0.344485
CUST_409_PI430030029	SaSA53_0251	2	0.388155	-0.0229605
CUST_3094_PI430030029	SaSA53_0252	2	-0.203726	0.0828724
CUST_410_PI430030029	SaSA53_0253	2	-0.133397	0.192902
CUST_411_PI430030029	SaSA53_0253	2	0.418497	-0.0326066
CUST_412_PI430030029	SaSA53_0254	2	0.0552125	-0.132291
CUST_413_PI430030029	SaSA53_0254	2	0.147626	-0.0935601
CUST_414_PI430030029	SaSA53_0255	2	0.0884372	-0.0162171
CUST_415_PI430030029	SaSA53_0255	2	-0.0763644	-0.0218527
CUST_416_PI430030029	SaSA53_0256	2	0.0606771	-0.133223
CUST_417_PI430030029	SaSA53_0256	2	0.0521922	-0.106903
CUST_3371_PI430030029	SaSA53_0257	2	0.0290648	-0.0903514
CUST_3374_PI430030029	SaSA53_0258	2	0.189377	-0.165364
CUST_418_PI430030029	SaSA53_0259	2	0.0456564	-0.0886916
CUST_419_PI430030029	SaSA53_0259	2	-0.042991	-0.142153
CUST_420_PI430030029	SaSA53_0260	2	0.134805	-0.115821
CUST_421_PI430030029	SaSA53_0260	2	0.0812608	-0.127148
CUST_422_PI430030029	SaSA53_0261	2	-0.0416567	0.0631223
CUST_423_PI430030029	SaSA53_0261	2	-0.0233636	0.0463243
CUST_424_PI430030029	SaSA53_0262	2	-0.0602932	0.0557919
CUST_425_PI430030029	SaSA53_0262	2	-0.16036	-0.0581784
CUST_426_PI430030029	SaSA53_0263	2	-0.0626869	0.0801598
CUST_427_PI430030029	SaSA53_0263	2	-0.249557	-0.216736
CUST_428_PI430030029	SaSA53_0264	2	0.401041	-0.296322
CUST_429_PI430030029	SaSA53_0264	2	0.19293	-0.452794
CUST_430_PI430030029	SaSA53_0265	2	-0.532359	0.434491
CUST_431_PI430030029	SaSA53_0265	2	-0.678741	0.389894
CUST_432_PI430030029	SaSA53_0266	2	-0.151524	0.289385
CUST_433_PI430030029	SaSA53_0266	2	-0.14666	0.304863
CUST_3095_PI430030029	SaSA53_0267	2	-0.177953	0.24138
CUST_3096_PI430030029	SaSA53_0267	2	-0.211948	0.295492
CUST_434_PI430030029	SaSA53_0267	2	-0.21003	0.249106
CUST_435_PI430030029	SaSA53_0267	2	-0.502913	0.0982052
CUST_436_PI430030029	SaSA53_0268	2	-0.244759	0.280452
CUST_437_PI430030029	SaSA53_0268	2	-0.236063	0.275031
CUST_438_PI430030029	SaSA53_0269	2	-0.125507	0.176962
CUST_439_PI430030029	SaSA53_0269	2	-0.169165	0.187718
CUST_440_PI430030029	SaSA53_0270	2	-0.0529258	0.014419
CUST_441_PI430030029	SaSA53_0270	2	-0.105948	-0.0950492
CUST_442_PI430030029	SaSA53_0271	2	0.375393	-0.27022
CUST_443_PI430030029	SaSA53_0271	2	0.32501	-0.316976
CUST_444_PI430030029	SaSA53_0272	2	0.0731997	-0.257874
CUST_445_PI430030029	SaSA53_0272	2	0.139766	-0.173395
CUST_446_PI430030029	SaSA53_0273	2	0.0475089	-0.171049
CUST_447_PI430030029	SaSA53_0273	2	0.0874399	-0.136332
CUST_448_PI430030029	SaSA53_0274	2	0.26023	-0.070793
CUST_449_PI430030029	SaSA53_0274	2	0.0265255	-0.00469526
CUST_450_PI430030029	SaSA53_0275	2	-0.000661055	-0.0577785
CUST_451_PI430030029	SaSA53_0275	2	0.00187397	0.0264349
CUST_3377_PI430030029	SaSA53_0276	2	-0.325377	0.364664
CUST_3378_PI430030029	SaSA53_0276	2	-0.269117	0.471637
CUST_3379_PI430030029	SaSA53_0277	1	-0.352942	0.458743
CUST_3380_PI430030029	SaSA53_0277	2	-0.00617266	-0.0960587
CUST_2920_PI430030029	SaSA53_0278	2	-0.268455	0.212069
CUST_2921_PI430030029	SaSA53_0278	2	-0.212703	0.301777
CUST_452_PI430030029	SaSA53_0278	2	-0.220418	0.224391
CUST_453_PI430030029	SaSA53_0278	2	-0.179594	0.283664
CUST_454_PI430030029	SaSA53_0279	2	-0.217118	0.165209
CUST_455_PI430030029	SaSA53_0279	2	-0.17351	0.390924
CUST_456_PI430030029	SaSA53_0280	2	-0.287142	0.386711
CUST_457_PI430030029	SaSA53_0280	2	-0.181956	0.403656
CUST_458_PI430030029	SaSA53_0281	2	-0.233109	0.329769
CUST_459_PI430030029	SaSA53_0281	2	-0.215737	0.42158
CUST_4441_PI430030029	SaSA53_0282	2	-0.18085	0.339539
CUST_4442_PI430030029	SaSA53_0282	2	-0.243083	0.28274
CUST_460_PI430030029	SaSA53_0283	2	0.181115	-0.254495
CUST_461_PI430030029	SaSA53_0283	2	-0.038586	-0.0645876
CUST_462_PI430030029	SaSA53_0284	2	0.200533	-0.145244
CUST_463_PI430030029	SaSA53_0284	2	0.138801	-0.216669
CUST_464_PI430030029	SaSA53_0285	2	0.490522	-0.254159
CUST_465_PI430030029	SaSA53_0285	2	0.240609	-0.407394
CUST_466_PI430030029	SaSA53_0286	2	0.200219	-0.186206
CUST_467_PI430030029	SaSA53_0286	2	0.300505	-0.292117
CUST_468_PI430030029	SaSA53_0287	2	0.182344	-0.236111
CUST_469_PI430030029	SaSA53_0287	2	0.176372	-0.240113
CUST_470_PI430030029	SaSA53_0288	2	0.00420761	-0.10822
CUST_471_PI430030029	SaSA53_0288	2	-0.0413763	-0.186487
CUST_472_PI430030029	SaSA53_0289	2	0.0311629	-0.0156301
CUST_473_PI430030029	SaSA53_0289	2	0.0319999	-0.0230681
CUST_474_PI430030029	SaSA53_0292	2	0.355671	-0.202809
CUST_475_PI430030029	SaSA53_0292	2	0.266548	-0.285123
CUST_476_PI430030029	SaSA53_0293	2	0.255079	-0.234202
CUST_477_PI430030029	SaSA53_0293	2	0.264122	-0.227035
CUST_478_PI430030029	SaSA53_0294	2	-0.0110189	-0.0891074
CUST_479_PI430030029	SaSA53_0294	2	0.0912506	-0.0523194
CUST_480_PI430030029	SaSA53_0296	2	-0.201518	-0.0990454
CUST_481_PI430030029	SaSA53_0296	2	0.183414	0.216952
CUST_482_PI430030029	SaSA53_0297	2	-0.102385	-0.237881
CUST_483_PI430030029	SaSA53_0297	2	-0.0764818	-0.215748
CUST_484_PI430030029	SaSA53_0298	2	0.118737	0.00974655
CUST_485_PI430030029	SaSA53_0298	2	-0.0189664	-0.0800991
CUST_486_PI430030029	SaSA53_0299	2	0.258097	-0.238787
CUST_487_PI430030029	SaSA53_0299	2	-0.0260735	-0.179067
CUST_3406_PI430030029	SaSA53_0300	2	0.907409	0.325707
CUST_488_PI430030029	SaSA53_0300	2	0.219078	-0.364816
CUST_489_PI430030029	SaSA53_0300	2	0.300241	-0.235392
CUST_4632_PI430030029	SaSA53_0301	2	0.389796	0.338317
CUST_4633_PI430030029	SaSA53_0301	2	0.0852931	-0.00851409
CUST_490_PI430030029	SaSA53_0301	2	0.189171	-0.104514
CUST_491_PI430030029	SaSA53_0301	2	0.223918	-0.0417786
CUST_492_PI430030029	SaSA53_0302	2	-0.0377464	-0.0810235
CUST_493_PI430030029	SaSA53_0302	2	0.0924548	-0.016417
CUST_494_PI430030029	SaSA53_0303	2	-0.029185	0.0204366
CUST_495_PI430030029	SaSA53_0303	2	-0.0402891	0.0339417
CUST_500_PI430030029	SaSA53_0305	2	0.0340309	0.0896786
CUST_3409_PI430030029	SaSA53_0306	2	-0.360464	0.255522
CUST_3410_PI430030029	SaSA53_0306	2	-0.241165	0.273861
CUST_3097_PI430030029	SaSA53_0307	2	0.0325945	0.0963467
CUST_3098_PI430030029	SaSA53_0307	2	-0.196855	0.118541
CUST_501_PI430030029	SaSA53_0307	2	0.00548013	-0.123534
CUST_502_PI430030029	SaSA53_0307	2	0.115923	-0.0737449
CUST_503_PI430030029	SaSA53_0308	2	-0.0325993	-0.133412
CUST_504_PI430030029	SaSA53_0308	2	-0.0459898	-0.177662
CUST_505_PI430030029	SaSA53_0309	2	0.241804	-0.151638
CUST_506_PI430030029	SaSA53_0309	2	0.311238	-0.157856
CUST_507_PI430030029	SaSA53_0310	2	0.186745	-0.145234
CUST_508_PI430030029	SaSA53_0310	2	0.197223	-0.253533
CUST_509_PI430030029	SaSA53_0311	2	-0.260215	0.188577
CUST_510_PI430030029	SaSA53_0311	2	-0.163399	0.311836
CUST_511_PI430030029	SaSA53_0312	2	-0.371482	0.427184
CUST_512_PI430030029	SaSA53_0312	2	-0.502784	0.26393
CUST_4590_PI430030029	SaSA53_0313	2	-0.472829	0.378523
CUST_4591_PI430030029	SaSA53_0313	2	-0.42729	0.448456
CUST_3337_PI430030029	SaSA53_0314	2	-0.50436	0.40663
CUST_513_PI430030029	SaSA53_0315	2	-0.100873	0.195151
CUST_514_PI430030029	SaSA53_0315	2	-0.538925	0.537641
CUST_515_PI430030029	SaSA53_0316	2	0.162586	-0.110261
CUST_516_PI430030029	SaSA53_0316	2	0.192297	-0.160687
CUST_517_PI430030029	SaSA53_0317	2	0.279635	-0.346716
CUST_518_PI430030029	SaSA53_0317	2	0.322071	-0.23958
CUST_519_PI430030029	SaSA53_0318	2	0.172946	-0.136367
CUST_520_PI430030029	SaSA53_0318	2	0.205436	-0.200339
CUST_521_PI430030029	SaSA53_0319	2	-0.575982	0.50898
CUST_522_PI430030029	SaSA53_0319	2	-0.529623	0.558478
CUST_523_PI430030029	SaSA53_0320	2	-0.521449	0.402146
CUST_524_PI430030029	SaSA53_0320	2	-0.623656	0.401323
CUST_525_PI430030029	SaSA53_0321	2	-0.190618	0.274115
CUST_526_PI430030029	SaSA53_0321	2	-0.230876	0.210327
CUST_527_PI430030029	SaSA53_0322	2	-0.285908	0.205264
CUST_528_PI430030029	SaSA53_0322	2	-0.0769793	0.226394
CUST_3085_PI430030029	SaSA53_0323	2	-0.176514	0.0771052
CUST_3086_PI430030029	SaSA53_0323	2	-0.191246	0.0936446
CUST_529_PI430030029	SaSA53_0324	2	0.191568	-0.121943
CUST_530_PI430030029	SaSA53_0324	2	0.136455	-0.151591
CUST_3341_PI430030029	SaSA53_0325	2	0.0561535	-0.15047
CUST_3342_PI430030029	SaSA53_0325	2	0.101619	-0.115867
CUST_531_PI430030029	SaSA53_0326	2	-0.213183	-0.235663
CUST_532_PI430030029	SaSA53_0326	2	-0.12498	-0.0718786
CUST_533_PI430030029	SaSA53_0327	2	-0.158637	-0.161648
CUST_534_PI430030029	SaSA53_0327	2	-0.117268	-0.204975
CUST_535_PI430030029	SaSA53_0328	2	0.295392	-0.248893
CUST_536_PI430030029	SaSA53_0328	2	0.292257	-0.259415
CUST_537_PI430030029	SaSA53_0329	2	0.103015	0.00360092
CUST_538_PI430030029	SaSA53_0329	2	-0.0665067	-0.229637
CUST_3343_PI430030029	SaSA53_0330	2	0.306584	0.36845
CUST_3344_PI430030029	SaSA53_0330	2	0.0587373	-0.0764225
CUST_539_PI430030029	SaSA53_0331	2	-0.168806	0.169879
CUST_540_PI430030029	SaSA53_0331	2	-0.241644	0.0625712
CUST_541_PI430030029	SaSA53_0332	2	0.466893	0.213566
CUST_542_PI430030029	SaSA53_0332	2	0.0238407	-0.207925
CUST_543_PI430030029	SaSA53_0333	2	-0.0346379	-0.00545899
CUST_544_PI430030029	SaSA53_0333	2	0.0354705	-0.00520245
CUST_545_PI430030029	SaSA53_0334	2	-0.206119	0.364292
CUST_546_PI430030029	SaSA53_0334	2	-0.292694	0.197524
CUST_547_PI430030029	SaSA53_0335	2	-0.384164	0.160062
CUST_548_PI430030029	SaSA53_0335	2	-0.338065	0.199157
CUST_549_PI430030029	SaSA53_0336	2	-0.629963	0.529046
CUST_550_PI430030029	SaSA53_0336	2	-0.637191	0.443227
CUST_551_PI430030029	SaSA53_0337	2	0.213958	-0.146771
CUST_552_PI430030029	SaSA53_0337	2	0.359149	-0.0603353
CUST_553_PI430030029	SaSA53_0338	2	-0.414051	0.329959
CUST_554_PI430030029	SaSA53_0338	2	-0.394157	0.295304
CUST_555_PI430030029	SaSA53_0339	2	-0.266115	0.309693
CUST_556_PI430030029	SaSA53_0339	2	-0.259352	0.298029
CUST_557_PI430030029	SaSA53_0340	2	-0.31358	0.161705
CUST_558_PI430030029	SaSA53_0340	2	-0.330839	0.410102
CUST_559_PI430030029	SaSA53_0341	2	-0.214126	0.0372116
CUST_560_PI430030029	SaSA53_0341	2	-0.430571	0.340533
CUST_561_PI430030029	SaSA53_0342	2	0.0139669	0.0845593
CUST_562_PI430030029	SaSA53_0342	2	-0.499218	0.413629
CUST_2922_PI430030029	SaSA53_0343	2	-0.410562	0.13134
CUST_2923_PI430030029	SaSA53_0343	2	-0.444377	0.292628
CUST_563_PI430030029	SaSA53_0344	2	-0.264997	0.0334355
CUST_564_PI430030029	SaSA53_0344	2	-0.649962	0.436432
CUST_565_PI430030029	SaSA53_0345	2	-0.229953	0.364588
CUST_566_PI430030029	SaSA53_0345	2	-0.290898	0.383989
CUST_3087_PI430030029	SaSA53_0347	2	-0.28712	0.306141
CUST_3088_PI430030029	SaSA53_0347	2	-0.189294	0.261791
CUST_567_PI430030029	SaSA53_0348	2	-0.120493	0.218702
CUST_568_PI430030029	SaSA53_0348	2	-0.120938	0.151296
CUST_569_PI430030029	SaSA53_0349	2	-0.204433	0.446923
CUST_570_PI430030029	SaSA53_0349	2	-0.278699	0.262008
CUST_571_PI430030029	SaSA53_0350	2	-0.271766	0.368158
CUST_572_PI430030029	SaSA53_0350	2	-0.300889	0.254898
CUST_3349_PI430030029	SaSA53_0351	2	-0.399584	0.336192
CUST_3350_PI430030029	SaSA53_0351	2	-0.388103	0.270137
CUST_573_PI430030029	SaSA53_0352	2	-0.245041	0.322168
CUST_574_PI430030029	SaSA53_0352	2	-0.323226	0.257224
CUST_575_PI430030029	SaSA53_0353	2	0.0096674	0.0462662
CUST_576_PI430030029	SaSA53_0353	2	0.0158124	0.0959878
CUST_577_PI430030029	SaSA53_0354	2	-0.153277	0.15289
CUST_578_PI430030029	SaSA53_0354	2	-0.115578	0.136593
CUST_579_PI430030029	SaSA53_0355	2	-0.310548	0.33955
CUST_580_PI430030029	SaSA53_0355	2	-0.217626	0.310869
CUST_581_PI430030029	SaSA53_0356	2	0.126705	0.0516178
CUST_3089_PI430030029	SaSA53_0357	2	-0.347919	0.167936
CUST_3090_PI430030029	SaSA53_0357	2	-0.203812	0.163093
CUST_582_PI430030029	SaSA53_0358	2	0.383657	0.0461235
CUST_583_PI430030029	SaSA53_0358	2	0.293539	-0.129156
CUST_584_PI430030029	SaSA53_0359	2	0.288376	-0.273632
CUST_585_PI430030029	SaSA53_0359	2	0.403453	-0.333444
CUST_3365_PI430030029	SaSA53_0360	2	-0.189749	0.105719
CUST_3366_PI430030029	SaSA53_0360	2	-0.0589517	0.111775
CUST_586_PI430030029	SaSA53_0361	2	0.0408457	0.0578599
CUST_587_PI430030029	SaSA53_0361	2	0.0367052	-0.103217
CUST_588_PI430030029	SaSA53_0362	2	0.25754	-0.257986
CUST_589_PI430030029	SaSA53_0362	2	0.2827	-0.24513
CUST_590_PI430030029	SaSA53_0363	2	-0.0585022	0.08052
CUST_591_PI430030029	SaSA53_0363	2	0.251222	0.205438
CUST_592_PI430030029	SaSA53_0364	2	-0.0610035	0.0568522
CUST_593_PI430030029	SaSA53_0364	2	-0.132178	-0.0554849
CUST_4648_PI430030029	SaSA53_0365	2	-0.100019	0.161877
CUST_4649_PI430030029	SaSA53_0365	2	-0.078618	0.084143
CUST_594_PI430030029	SaSA53_0366	2	-0.131533	0.0408797
CUST_595_PI430030029	SaSA53_0366	2	-0.167877	0.00370089
CUST_596_PI430030029	SaSA53_0367	2	-0.125892	0.161978
CUST_597_PI430030029	SaSA53_0367	2	-0.0890444	0.169057
CUST_598_PI430030029	SaSA53_0368	2	-0.280622	0.345317
CUST_599_PI430030029	SaSA53_0368	2	-0.234414	0.474408
CUST_3367_PI430030029	SaSA53_0369	2	0.113283	-0.148299
CUST_3368_PI430030029	SaSA53_0369	2	0.269017	-0.18954
CUST_600_PI430030029	SaSA53_0370	2	0.0647329	-0.193186
CUST_601_PI430030029	SaSA53_0370	2	0.206514	-0.149265
CUST_602_PI430030029	SaSA53_0371	2	-0.266462	0.308256
CUST_603_PI430030029	SaSA53_0371	2	-0.379254	0.212106
CUST_604_PI430030029	SaSA53_0372	2	-0.430956	0.465213
CUST_605_PI430030029	SaSA53_0372	2	-0.432204	0.419618
CUST_606_PI430030029	SaSA53_0373	2	-0.530733	0.584032
CUST_607_PI430030029	SaSA53_0373	2	-0.502322	0.584663
CUST_608_PI430030029	SaSA53_0374	2	-0.515441	0.603677
CUST_609_PI430030029	SaSA53_0374	2	-0.498967	0.642478
CUST_610_PI430030029	SaSA53_0375	2	-0.600209	0.564023
CUST_611_PI430030029	SaSA53_0375	2	-0.487397	0.613236
CUST_612_PI430030029	SaSA53_0376	2	0.117606	-0.24222
CUST_613_PI430030029	SaSA53_0376	2	0.271776	-0.169459
CUST_614_PI430030029	SaSA53_0377	2	0.222077	-0.388648
CUST_615_PI430030029	SaSA53_0377	2	0.357504	-0.430805
CUST_616_PI430030029	SaSA53_0378	2	-0.334404	0.370771
CUST_617_PI430030029	SaSA53_0378	2	-0.410219	0.310379
CUST_618_PI430030029	SaSA53_0379	2	-0.120847	0.0662721
CUST_619_PI430030029	SaSA53_0379	2	-0.0105581	0.247657
CUST_620_PI430030029	SaSA53_0380	2	-0.32939	0.288341
CUST_621_PI430030029	SaSA53_0380	2	-0.323614	0.164039
CUST_3099_PI430030029	SaSA53_0381	2	0.0770712	0.0966876
CUST_3100_PI430030029	SaSA53_0381	2	-0.00691605	-0.0510035
CUST_622_PI430030029	SaSA53_0382	2	0.0681826	-0.0104192
CUST_623_PI430030029	SaSA53_0382	2	0.00521453	-0.0657147
CUST_624_PI430030029	SaSA53_0383	2	-0.212255	0.35625
CUST_625_PI430030029	SaSA53_0383	2	-0.330059	0.304088
CUST_626_PI430030029	SaSA53_0384	2	-0.324191	0.232206
CUST_627_PI430030029	SaSA53_0384	2	-0.26053	0.354766
CUST_628_PI430030029	SaSA53_0385	2	-0.343001	0.498831
CUST_629_PI430030029	SaSA53_0385	2	-0.335284	0.428273
CUST_3101_PI430030029	SaSA53_0386	2	-0.318892	0.380875
CUST_3102_PI430030029	SaSA53_0386	2	-0.377878	0.318694
CUST_4031_PI430030029	SaSA53_0386	2	-0.35869	0.347433
CUST_4032_PI430030029	SaSA53_0386	2	-0.28371	0.366805
CUST_630_PI430030029	SaSA53_0387	2	-0.649436	0.449707
CUST_631_PI430030029	SaSA53_0387	2	-0.442	0.37603
CUST_632_PI430030029	SaSA53_0388	2	-0.314789	0.562234
CUST_633_PI430030029	SaSA53_0388	2	-0.312666	0.488222
CUST_634_PI430030029	SaSA53_0389	2	-0.376614	0.251821
CUST_635_PI430030029	SaSA53_0389	2	-0.231396	0.35516
CUST_3465_PI430030029	SaSA53_0391	2	-0.24503	0.19331
CUST_3466_PI430030029	SaSA53_0391	2	-0.197399	0.178242
CUST_636_PI430030029	SaSA53_0392	2	-0.207851	0.244307
CUST_637_PI430030029	SaSA53_0392	2	-0.3175	0.117883
CUST_638_PI430030029	SaSA53_0393	2	-0.166731	0.215298
CUST_639_PI430030029	SaSA53_0393	2	-0.238718	0.123035
CUST_640_PI430030029	SaSA53_0394	2	-0.140642	0.192402
CUST_641_PI430030029	SaSA53_0394	2	-0.0374363	0.199453
CUST_642_PI430030029	SaSA53_0395	2	-0.190604	0.132884
CUST_643_PI430030029	SaSA53_0395	2	-0.0924137	0.165719
CUST_644_PI430030029	SaSA53_0396	2	0.212264	-0.272863
CUST_645_PI430030029	SaSA53_0396	2	0.193318	-0.249039
CUST_646_PI430030029	SaSA53_0397	2	0.110141	-0.106781
CUST_647_PI430030029	SaSA53_0397	1	0.354877	-0.227704
CUST_649_PI430030029	SaSA53_0398	2	-0.555695	0.361739
CUST_650_PI430030029	SaSA53_0398	2	-0.51214	0.430754
CUST_651_PI430030029	SaSA53_0399	2	-0.497579	0.429953
CUST_652_PI430030029	SaSA53_0399	2	-0.499498	0.381899
CUST_653_PI430030029	SaSA53_0400	2	-0.479021	0.478189
CUST_654_PI430030029	SaSA53_0400	2	-0.484327	0.391699
CUST_655_PI430030029	SaSA53_0401	2	-0.0750922	0.0944861
CUST_656_PI430030029	SaSA53_0401	2	-0.0826664	0.0307089
CUST_657_PI430030029	SaSA53_0402	1	0.585639	-0.161198
CUST_658_PI430030029	SaSA53_0402	1	0.121705	-0.0148444
CUST_659_PI430030029	SaSA53_0403	2	0.435947	-0.157531
CUST_660_PI430030029	SaSA53_0403	2	0.278416	-0.092147
CUST_661_PI430030029	SaSA53_0404	2	-0.00945791	-0.0361735
CUST_662_PI430030029	SaSA53_0404	2	0.012677	-0.0803459
CUST_663_PI430030029	SaSA53_0405	2	0.426566	-0.122466
CUST_664_PI430030029	SaSA53_0405	2	0.0365706	0.100448
CUST_665_PI430030029	SaSA53_0406	2	0.038671	0.0557381
CUST_2925_PI430030029	SaSA53_0407	2	0.0473226	0.00962639
CUST_667_PI430030029	SaSA53_0408	2	-0.0305688	0.0763974
CUST_668_PI430030029	SaSA53_0408	2	0.03174	0.0752276
CUST_669_PI430030029	SaSA53_0409	2	-0.0586503	0.294423
CUST_670_PI430030029	SaSA53_0409	2	-0.0756173	0.265242
CUST_3105_PI430030029	SaSA53_0410	2	0.230426	-0.162573
CUST_3106_PI430030029	SaSA53_0410	2	0.0559282	-0.257161
CUST_3471_PI430030029	SaSA53_0410	2	0.325755	-0.0564775
CUST_3472_PI430030029	SaSA53_0410	2	-0.0548836	-0.179796
CUST_671_PI430030029	SaSA53_0411	2	-0.0975599	0.102098
CUST_672_PI430030029	SaSA53_0411	2	-0.0727796	0.103294
CUST_3107_PI430030029	SaSA53_0412	2	-0.00430759	0.0124464
CUST_3108_PI430030029	SaSA53_0412	2	0.0592643	-0.0521293
CUST_3109_PI430030029	SaSA53_0413	2	-0.0478773	-0.0697107
CUST_3110_PI430030029	SaSA53_0413	2	-0.0675131	0.031237
CUST_673_PI430030029	SaSA53_0413	2	0.0478986	-0.0237544
CUST_674_PI430030029	SaSA53_0413	2	0.0164267	-0.0323741
CUST_2926_PI430030029	SaSA53_0414	2	-0.0511583	-0.0453571
CUST_2927_PI430030029	SaSA53_0414	2	-0.047737	0.0659399
CUST_675_PI430030029	SaSA53_0415	2	0.0539281	-0.157955
CUST_676_PI430030029	SaSA53_0415	2	0.157035	-0.211994
CUST_677_PI430030029	SaSA53_0416	2	0.181111	-0.0692058
CUST_678_PI430030029	SaSA53_0416	2	0.138486	-0.0942847
CUST_3111_PI430030029	SaSA53_0417	2	0.0109967	0.00575876
CUST_3112_PI430030029	SaSA53_0417	2	-0.0557557	0.00794435
CUST_679_PI430030029	SaSA53_0418	2	0.0917285	-0.0581258
CUST_680_PI430030029	SaSA53_0418	2	0.0351063	0.11167
CUST_681_PI430030029	SaSA53_0419	2	0.0148164	-0.0761514
CUST_682_PI430030029	SaSA53_0419	2	0.0110094	-0.0848915
CUST_683_PI430030029	SaSA53_0420	2	0.525206	-0.428466
CUST_684_PI430030029	SaSA53_0420	2	0.510077	-0.350776
CUST_4036_PI430030029	SaSA53_0421	1	2.10891	0.884438
CUST_685_PI430030029	SaSA53_0421	2	0.367696	-0.367331
CUST_686_PI430030029	SaSA53_0421	2	0.276585	-0.36501
CUST_3473_PI430030029	SaSA53_0422	2	0.430984	-0.374055
CUST_3474_PI430030029	SaSA53_0422	2	0.351133	-0.242127
CUST_687_PI430030029	SaSA53_0423	2	0.389253	-0.103651
CUST_688_PI430030029	SaSA53_0423	2	0.308885	-0.153967
CUST_689_PI430030029	SaSA53_0425	2	0.12602	-0.327953
CUST_690_PI430030029	SaSA53_0425	2	0.226924	-0.292291
CUST_691_PI430030029	SaSA53_0426	2	0.0511227	-0.178676
CUST_692_PI430030029	SaSA53_0426	2	0.0670487	-0.224052
CUST_693_PI430030029	SaSA53_0427	2	0.2673	-0.264566
CUST_694_PI430030029	SaSA53_0427	2	0.398249	-0.269724
CUST_695_PI430030029	SaSA53_0427	2	0.492497	-0.363876
CUST_696_PI430030029	SaSA53_0427	2	0.436109	-0.393875
CUST_697_PI430030029	SaSA53_0427	2	0.402052	-0.273202
CUST_698_PI430030029	SaSA53_0427	2	0.433576	-0.337925
CUST_699_PI430030029	SaSA53_0427	2	0.462424	-0.149894
CUST_700_PI430030029	SaSA53_0427	2	0.112993	0.0427011
CUST_701_PI430030029	SaSA53_0428	2	0.367133	-0.0951303
CUST_702_PI430030029	SaSA53_0428	2	0.0684109	-0.0590502
CUST_3113_PI430030029	SaSA53_0429	2	0.0999211	-0.106584
CUST_3114_PI430030029	SaSA53_0429	2	0.107806	-0.015
CUST_703_PI430030029	SaSA53_0429	2	0.131864	-0.173719
CUST_704_PI430030029	SaSA53_0429	2	0.0961442	-0.0665822
CUST_705_PI430030029	SaSA53_0430	2	0.20964	-0.0824955
CUST_706_PI430030029	SaSA53_0430	2	0.203066	-0.149057
CUST_707_PI430030029	SaSA53_0430	2	0.133902	-0.267441
CUST_708_PI430030029	SaSA53_0430	2	0.223776	-0.272931
CUST_709_PI430030029	SaSA53_0431	2	0.115082	-0.0679061
CUST_710_PI430030029	SaSA53_0431	2	0.103782	-0.13906
CUST_2928_PI430030029	SaSA53_0432	2	-0.0405388	-0.0441853
CUST_2929_PI430030029	SaSA53_0432	2	0.178898	0.121643
CUST_3477_PI430030029	SaSA53_0433	2	-0.0304297	0.0476286
CUST_3478_PI430030029	SaSA53_0433	2	-0.0105599	0.0478638
CUST_711_PI430030029	SaSA53_0434	2	-0.23719	0.191584
CUST_712_PI430030029	SaSA53_0434	2	-0.263718	0.0927924
CUST_713_PI430030029	SaSA53_0435	2	-0.187378	0.255365
CUST_714_PI430030029	SaSA53_0435	2	-0.0678671	0.264926
CUST_3479_PI430030029	SaSA53_0436	2	-0.288067	0.308584
CUST_3480_PI430030029	SaSA53_0436	2	-0.144758	0.321659
CUST_715_PI430030029	SaSA53_0437	2	-0.039917	0.0842098
CUST_716_PI430030029	SaSA53_0437	2	-0.0691207	0.0271902
CUST_717_PI430030029	SaSA53_0438	2	0.0142093	0.019292
CUST_718_PI430030029	SaSA53_0438	2	0.0487978	0.0995787
CUST_719_PI430030029	SaSA53_0439	2	-0.0658795	0.173702
CUST_720_PI430030029	SaSA53_0439	2	-0.119345	0.0510893
CUST_3481_PI430030029	SaSA53_0440	2	-0.2417	0.16035
CUST_3482_PI430030029	SaSA53_0440	2	0.344374	0.728111
CUST_721_PI430030029	SaSA53_0440	2	-0.263161	0.171055
CUST_722_PI430030029	SaSA53_0440	2	0.411349	0.739387
CUST_3484_PI430030029	SaSA53_0441	2	0.0698983	0.0283136
CUST_723_PI430030029	SaSA53_0442	2	0.162963	-0.112188
CUST_724_PI430030029	SaSA53_0442	2	0.115341	-0.240329
CUST_3117_PI430030029	SaSA53_0444	2	0.0203114	-0.0335267
CUST_3118_PI430030029	SaSA53_0444	2	0.0201974	-0.0979438
CUST_2930_PI430030029	SaSA53_0445	2	-0.266857	0.341298
CUST_2931_PI430030029	SaSA53_0445	2	-0.279984	0.286998
CUST_725_PI430030029	SaSA53_0446	2	-0.428412	0.438909
CUST_726_PI430030029	SaSA53_0446	2	-0.627392	0.231302
CUST_3485_PI430030029	SaSA53_0447	2	0.270578	0.230814
CUST_3486_PI430030029	SaSA53_0447	2	0.0651739	0.276689
CUST_727_PI430030029	SaSA53_0448	2	-0.183352	0.221537
CUST_728_PI430030029	SaSA53_0448	2	-0.0961162	0.162067
CUST_2932_PI430030029	SaSA53_0449	2	-0.130405	0.115785
CUST_2933_PI430030029	SaSA53_0449	1	0	0.156843
CUST_729_PI430030029	SaSA53_0450	2	-0.230928	0.32249
CUST_730_PI430030029	SaSA53_0450	2	-0.295247	0.329596
CUST_731_PI430030029	SaSA53_0451	2	-0.303662	0.288138
CUST_732_PI430030029	SaSA53_0451	2	-0.379434	0.316916
CUST_733_PI430030029	SaSA53_0452	2	-0.293916	0.258587
CUST_734_PI430030029	SaSA53_0452	2	-0.337104	0.365892
CUST_735_PI430030029	SaSA53_0453	2	-0.0663155	-0.106296
CUST_736_PI430030029	SaSA53_0453	2	0.0772471	-0.00532421
CUST_737_PI430030029	SaSA53_0454	2	-0.319204	0.197904
CUST_739_PI430030029	SaSA53_0455	2	0.0910985	-0.0715116
CUST_740_PI430030029	SaSA53_0455	2	0.401302	0.345484
CUST_3487_PI430030029	SaSA53_0456	2	0.709457	0.23759
CUST_2934_PI430030029	SaSA53_0457	2	0.0879464	-0.391959
CUST_2935_PI430030029	SaSA53_0457	2	0.164829	-0.0136307
CUST_741_PI430030029	SaSA53_0458	2	0.110717	0.113901
CUST_742_PI430030029	SaSA53_0458	2	0.0733503	-0.0378768
CUST_743_PI430030029	SaSA53_0459	2	0.16752	0.123011
CUST_744_PI430030029	SaSA53_0459	2	0.178738	0.0429532
CUST_745_PI430030029	SaSA53_0460	2	0.0872142	-0.0102269
CUST_746_PI430030029	SaSA53_0460	2	0.0846384	-0.0766966
CUST_747_PI430030029	SaSA53_0461	2	0.28023	-0.161671
CUST_748_PI430030029	SaSA53_0461	2	0.314466	-0.167413
CUST_4046_PI430030029	SaSA53_0462	2	0.407386	-0.025708
CUST_749_PI430030029	SaSA53_0463	2	0.00683403	-0.0564763
CUST_750_PI430030029	SaSA53_0463	2	0.0242435	-0.0594204
CUST_751_PI430030029	SaSA53_0464	2	-0.0251923	-0.0676603
CUST_752_PI430030029	SaSA53_0464	2	0.0113694	-0.0474211
CUST_753_PI430030029	SaSA53_0465	2	0.0158939	-0.0263923
CUST_754_PI430030029	SaSA53_0465	2	0.0296062	0.0186014
CUST_755_PI430030029	SaSA53_0466	2	0.116546	-0.147805
CUST_756_PI430030029	SaSA53_0466	2	0.0521805	-0.189081
CUST_757_PI430030029	SaSA53_0467	2	0.126268	-0.128354
CUST_758_PI430030029	SaSA53_0467	2	0.103877	-0.195894
CUST_759_PI430030029	SaSA53_0468	2	-0.178096	-0.0528213
CUST_760_PI430030029	SaSA53_0468	2	-0.034338	-0.0252256
CUST_761_PI430030029	SaSA53_0469	2	0.00108417	-0.0355646
CUST_762_PI430030029	SaSA53_0469	2	-0.024579	-0.0425536
CUST_763_PI430030029	SaSA53_0470	2	-0.221744	0.255893
CUST_764_PI430030029	SaSA53_0470	2	-0.145338	0.160869
CUST_765_PI430030029	SaSA53_0471	2	-0.444968	0.399017
CUST_766_PI430030029	SaSA53_0471	2	-0.428862	0.368215
CUST_3489_PI430030029	SaSA53_0472	2	-0.845865	0.61115
CUST_3490_PI430030029	SaSA53_0472	2	-0.797499	0.69795
CUST_767_PI430030029	SaSA53_0473	2	-0.378508	0.378555
CUST_768_PI430030029	SaSA53_0473	2	-0.421553	0.215638
CUST_769_PI430030029	SaSA53_0474	2	-0.030783	0.0639699
CUST_770_PI430030029	SaSA53_0474	2	0.0294466	0.202525
CUST_771_PI430030029	SaSA53_0475	2	-0.143359	0.157888
CUST_772_PI430030029	SaSA53_0475	2	-0.141297	0.212343
CUST_4_PI430029661	SaSA53_0476	2	-0.209731	0.287081
CUST_5_PI430029661	SaSA53_0476	2	-0.1996	0.250507
CUST_6_PI430029661	SaSA53_0476	2	-0.1957	0.206422
CUST_773_PI430030029	SaSA53_0476	2	-0.212638	0.27343
CUST_774_PI430030029	SaSA53_0476	2	-0.201875	0.228032
CUST_775_PI430030029	SaSA53_0477	2	-0.601234	0.531704
CUST_776_PI430030029	SaSA53_0477	2	-0.567463	0.392529
CUST_777_PI430030029	SaSA53_0478	2	-0.200247	0.212339
CUST_778_PI430030029	SaSA53_0478	2	-0.221889	0.214123
CUST_779_PI430030029	SaSA53_0479	2	-0.161999	0.187006
CUST_780_PI430030029	SaSA53_0479	2	-0.18094	0.119228
CUST_781_PI430030029	SaSA53_0480	2	-0.0249516	0.0852954
CUST_782_PI430030029	SaSA53_0480	2	-0.0340586	-0.100202
CUST_783_PI430030029	SaSA53_0481	2	0.0135099	-0.0102235
CUST_784_PI430030029	SaSA53_0481	2	-0.0624844	0.096893
CUST_785_PI430030029	SaSA53_0482	2	0.0331081	0.118361
CUST_786_PI430030029	SaSA53_0482	2	-0.0608759	0.0180025
CUST_787_PI430030029	SaSA53_0483	2	-0.144658	-0.138712
CUST_788_PI430030029	SaSA53_0483	2	-0.0195676	-0.0934497
CUST_789_PI430030029	SaSA53_0484	2	-0.0862902	-0.138605
CUST_790_PI430030029	SaSA53_0484	2	0.114479	-0.133352
CUST_791_PI430030029	SaSA53_0485	2	-0.0722958	-0.0391404
CUST_792_PI430030029	SaSA53_0485	2	0.0173093	0.0180847
CUST_793_PI430030029	SaSA53_0486	2	0.126754	-0.0876161
CUST_794_PI430030029	SaSA53_0486	2	0.130524	-0.0816612
CUST_795_PI430030029	SaSA53_0487	2	0.463356	0.280893
CUST_796_PI430030029	SaSA53_0487	2	-0.0254485	-0.105626
CUST_797_PI430030029	SaSA53_0488	2	0.00423161	0.0800767
CUST_798_PI430030029	SaSA53_0488	2	-0.0314584	-0.0355595
CUST_799_PI430030029	SaSA53_0489	2	0.0755378	-0.0228511
CUST_800_PI430030029	SaSA53_0489	2	-0.14255	0.0993822
CUST_801_PI430030029	SaSA53_0490	2	-0.36443	0.268412
CUST_802_PI430030029	SaSA53_0490	1	0.202717	0.0518084
CUST_803_PI430030029	SaSA53_0491	2	0.288225	-0.405837
CUST_804_PI430030029	SaSA53_0491	2	0.348687	-0.336044
CUST_805_PI430030029	SaSA53_0492	2	0.309591	-0.197574
CUST_806_PI430030029	SaSA53_0492	2	0.367515	-0.19627
CUST_807_PI430030029	SaSA53_0493	2	0.119877	-0.210888
CUST_808_PI430030029	SaSA53_0493	2	0.129181	-0.254404
CUST_3119_PI430030029	SaSA53_0494	2	0.472664	-0.446022
CUST_3120_PI430030029	SaSA53_0494	2	0.43528	-0.344482
CUST_3491_PI430030029	SaSA53_0494	2	0.201854	-0.560111
CUST_3492_PI430030029	SaSA53_0494	2	0.297738	-0.40941
CUST_809_PI430030029	SaSA53_0495	2	0.241897	-0.367699
CUST_810_PI430030029	SaSA53_0495	2	0.253654	-0.322438
CUST_811_PI430030029	SaSA53_0496	2	0.451426	-0.268089
CUST_812_PI430030029	SaSA53_0496	2	0.468738	-0.0637687
CUST_814_PI430030029	SaSA53_0497	2	0.269701	-0.384533
CUST_815_PI430030029	SaSA53_0498	2	-0.205517	0.129951
CUST_816_PI430030029	SaSA53_0498	2	-0.189279	0.0777141
CUST_817_PI430030029	SaSA53_0499	2	0.132789	-0.0500463
CUST_818_PI430030029	SaSA53_0499	2	0.0766274	-0.109613
CUST_819_PI430030029	SaSA53_0500	2	-0.298111	0.1773
CUST_820_PI430030029	SaSA53_0500	2	-0.221081	0.181114
CUST_821_PI430030029	SaSA53_0501	2	-0.0810486	0.333608
CUST_822_PI430030029	SaSA53_0501	2	-0.184075	0.219041
CUST_823_PI430030029	SaSA53_0502	2	-0.0232024	0.234242
CUST_824_PI430030029	SaSA53_0502	2	-0.0525546	0.187566
CUST_825_PI430030029	SaSA53_0503	2	-0.105392	0.354593
CUST_826_PI430030029	SaSA53_0503	2	-0.13385	0.269135
CUST_827_PI430030029	SaSA53_0504	2	-0.18137	0.468824
CUST_828_PI430030029	SaSA53_0504	2	-0.228313	0.305358
CUST_829_PI430030029	SaSA53_0505	2	0.0744117	-0.200315
CUST_830_PI430030029	SaSA53_0505	2	0.0310917	-0.199435
CUST_831_PI430030029	SaSA53_0506	2	0.113781	-0.200341
CUST_832_PI430030029	SaSA53_0506	2	0.155981	-0.21425
CUST_833_PI430030029	SaSA53_0507	2	-0.947343	0.750052
CUST_834_PI430030029	SaSA53_0507	2	-0.628015	0.688453
CUST_835_PI430030029	SaSA53_0508	2	0.0349482	0.0698021
CUST_836_PI430030029	SaSA53_0508	2	0.0188174	-0.00754499
CUST_837_PI430030029	SaSA53_0509	2	0.0699361	-0.127542
CUST_838_PI430030029	SaSA53_0509	2	-0.00386413	-0.199888
CUST_839_PI430030029	SaSA53_0510	2	-0.134129	-0.00666142
CUST_840_PI430030029	SaSA53_0510	2	-0.134975	0.0563407
CUST_841_PI430030029	SaSA53_0511	2	-0.0622042	0.09582
CUST_842_PI430030029	SaSA53_0511	2	0.151748	0.228051
CUST_843_PI430030029	SaSA53_0512	2	0.24256	-0.20274
CUST_844_PI430030029	SaSA53_0512	2	0.190643	-0.122405
CUST_845_PI430030029	SaSA53_0513	2	0.36947	-0.349531
CUST_846_PI430030029	SaSA53_0513	2	0.346198	-0.341976
CUST_847_PI430030029	SaSA53_0514	2	-0.0774647	0.0669381
CUST_848_PI430030029	SaSA53_0514	2	-0.168726	0.0657241
CUST_849_PI430030029	SaSA53_0515	2	-0.164348	-0.099277
CUST_850_PI430030029	SaSA53_0515	2	-0.158727	-0.0740266
CUST_851_PI430030029	SaSA53_0516	2	-0.009449	-0.00161584
CUST_852_PI430030029	SaSA53_0516	2	0.0243835	-0.0282882
CUST_853_PI430030029	SaSA53_0517	2	0.113801	-0.0127023
CUST_854_PI430030029	SaSA53_0517	2	0.0840937	-0.0169776
CUST_3122_PI430030029	SaSA53_0518	2	0.0157064	0.50271
CUST_3494_PI430030029	SaSA53_0518	2	0.020319	0.512027
CUST_855_PI430030029	SaSA53_0519	2	0.134539	0.142516
CUST_856_PI430030029	SaSA53_0519	2	-0.0424072	0.0924064
CUST_857_PI430030029	SaSA53_0520	2	0.250206	0.0626434
CUST_858_PI430030029	SaSA53_0520	2	0.109643	-0.0890571
CUST_859_PI430030029	SaSA53_0521	2	0.150486	-0.226291
CUST_860_PI430030029	SaSA53_0521	2	0.129402	-0.178673
CUST_861_PI430030029	SaSA53_0522	2	0.0499551	0.0475251
CUST_862_PI430030029	SaSA53_0522	2	0.0834099	-0.0595497
CUST_863_PI430030029	SaSA53_0523	2	0.368653	0.221316
CUST_864_PI430030029	SaSA53_0523	2	0.129398	0.0563566
CUST_3123_PI430030029	SaSA53_0524	2	-0.0917927	0.035319
CUST_3124_PI430030029	SaSA53_0524	2	-0.141605	-0.0918179
CUST_865_PI430030029	SaSA53_0525	2	-0.16543	0.18507
CUST_866_PI430030029	SaSA53_0525	2	-0.218091	0.215026
CUST_868_PI430030029	SaSA53_0526	2	-0.0986565	0.00988372
CUST_869_PI430030029	SaSA53_0526	2	0.043602	0.0303364
CUST_870_PI430030029	SaSA53_0527	2	-0.168037	0.107961
CUST_871_PI430030029	SaSA53_0527	2	-0.0288159	0.116985
CUST_872_PI430030029	SaSA53_0528	2	0.0905596	-0.181877
CUST_873_PI430030029	SaSA53_0528	2	0.0455723	-0.176369
CUST_874_PI430030029	SaSA53_0529	2	-0.0344302	0.313986
CUST_875_PI430030029	SaSA53_0529	2	-0.0720043	0.246274
CUST_876_PI430030029	SaSA53_0530	2	-0.0857002	0.283349
CUST_877_PI430030029	SaSA53_0530	2	-0.133254	0.282131
CUST_878_PI430030029	SaSA53_0531	2	0.0663238	-0.0964497
CUST_879_PI430030029	SaSA53_0531	2	0.0778828	-0.0373774
CUST_4051_PI430030029	SaSA53_0532	2	0.25299	-0.379661
CUST_4052_PI430030029	SaSA53_0532	2	0.19091	-0.491262
CUST_880_PI430030029	SaSA53_0533	2	-0.157115	0.114843
CUST_881_PI430030029	SaSA53_0533	2	-0.0301587	0.144664
CUST_9020_PI430030029	SaSA53_0533	2	-0.171781	0.0687116
CUST_3514_PI430030029	SaSA53_0534	2	0.402392	-0.074021
CUST_882_PI430030029	SaSA53_0535	2	0.248118	-0.17565
CUST_883_PI430030029	SaSA53_0535	2	0.196467	-0.19618
CUST_884_PI430030029	SaSA53_0536	2	0.186979	-0.190772
CUST_885_PI430030029	SaSA53_0536	2	0.26145	-0.177633
CUST_886_PI430030029	SaSA53_0537	2	-0.320243	0.376613
CUST_887_PI430030029	SaSA53_0537	2	-0.297604	0.310606
CUST_888_PI430030029	SaSA53_0538	2	0.0881392	0.340015
CUST_889_PI430030029	SaSA53_0538	2	-0.111501	0.123917
CUST_890_PI430030029	SaSA53_0541	2	-0.131947	0.290537
CUST_891_PI430030029	SaSA53_0541	2	-0.157609	0.256071
CUST_892_PI430030029	SaSA53_0542	2	-0.118291	0.130471
CUST_893_PI430030029	SaSA53_0542	2	-0.208721	-0.00353177
CUST_894_PI430030029	SaSA53_0543	2	-0.176523	0.204296
CUST_895_PI430030029	SaSA53_0543	2	-0.107038	0.284745
CUST_896_PI430030029	SaSA53_0544	2	-0.0963473	0.110445
CUST_897_PI430030029	SaSA53_0544	2	-0.143477	0.00656732
CUST_898_PI430030029	SaSA53_0545	2	0.000249386	0.180535
CUST_899_PI430030029	SaSA53_0545	2	-0.0140796	0.153656
CUST_4092_PI430030029	SaSA53_0548	2	0.826649	1.01861
CUST_4093_PI430030029	SaSA53_0548	2	-0.220667	0.196419
CUST_900_PI430030029	SaSA53_0549	2	-0.489103	0.266481
CUST_901_PI430030029	SaSA53_0549	2	-0.551997	0.190698
CUST_902_PI430030029	SaSA53_0550	2	-0.155337	0.0557324
CUST_903_PI430030029	SaSA53_0550	2	-0.215677	0.148253
CUST_2936_PI430030029	SaSA53_0551	2	-0.432254	0.397333
CUST_2937_PI430030029	SaSA53_0551	2	-0.50365	0.524321
CUST_904_PI430030029	SaSA53_0552	2	0.519162	0.0312077
CUST_905_PI430030029	SaSA53_0552	2	0.771193	0.517812
CUST_906_PI430030029	SaSA53_0556	2	-0.0330733	0.0197075
CUST_907_PI430030029	SaSA53_0557	2	-0.0459975	0.401816
CUST_908_PI430030029	SaSA53_0557	2	-0.465114	0.22673
CUST_910_PI430030029	SaSA53_0558	2	-0.352537	0.428988
CUST_911_PI430030029	SaSA53_0559	2	0.0416808	0.290174
CUST_912_PI430030029	SaSA53_0559	2	-0.247343	0.260376
CUST_3607_PI430030029	SaSA53_0561	1	0.659529	-0.0360165
CUST_913_PI430030029	SaSA53_0562	2	-0.090236	0.112783
CUST_914_PI430030029	SaSA53_0562	2	-0.0426345	0.04239
CUST_2938_PI430030029	SaSA53_0563	2	-0.255616	-0.0321763
CUST_2939_PI430030029	SaSA53_0563	2	-0.129808	0.123791
CUST_3127_PI430030029	SaSA53_0564	2	-0.194957	0.235383
CUST_3128_PI430030029	SaSA53_0564	1	0.678913	0.330152
CUST_2940_PI430030029	SaSA53_0565	2	-0.0715802	0.1131
CUST_2941_PI430030029	SaSA53_0565	2	-0.126881	-0.0359741
CUST_3619_PI430030029	SaSA53_0566	2	-0.0763146	0.123334
CUST_3620_PI430030029	SaSA53_0566	2	-0.243765	0.0989795
CUST_915_PI430030029	SaSA53_0567	2	-0.314129	0.354203
CUST_916_PI430030029	SaSA53_0567	2	-0.273077	0.319311
CUST_3636_PI430030029	SaSA53_0570	2	0.13962	0.0652235
CUST_917_PI430030029	SaSA53_0570	2	-0.430666	0.414199
CUST_918_PI430030029	SaSA53_0570	2	-0.310917	0.545226
CUST_3141_PI430030029	SaSA53_0571	2	-0.458953	0.431926
CUST_3142_PI430030029	SaSA53_0571	2	-0.397398	0.416589
CUST_4108_PI430030029	SaSA53_0571	2	-0.192144	-0.0667842
CUST_4109_PI430030029	SaSA53_0571	2	-0.324249	0.321233
CUST_919_PI430030029	SaSA53_0572	2	-0.493986	0.339815
CUST_920_PI430030029	SaSA53_0572	2	-0.253835	0.114839
CUST_4110_PI430030029	SaSA53_0573	1	-0.29045	0.249646
CUST_4111_PI430030029	SaSA53_0573	2	-0.174513	0.315912
CUST_921_PI430030029	SaSA53_0573	2	-0.206381	0.229823
CUST_922_PI430030029	SaSA53_0573	2	-0.310765	0.360865
CUST_923_PI430030029	SaSA53_0574	2	-0.329233	0.195174
CUST_924_PI430030029	SaSA53_0574	2	0.167678	-0.0164231
CUST_4112_PI430030029	SaSA53_0575	2	-0.377582	0.217221
CUST_4113_PI430030029	SaSA53_0575	2	-0.251415	0.207219
CUST_3143_PI430030029	SaSA53_0578	2	-0.127753	0.132592
CUST_3144_PI430030029	SaSA53_0578	2	-0.179944	0.146179
CUST_925_PI430030029	SaSA53_0579	2	-0.217678	0.435528
CUST_926_PI430030029	SaSA53_0579	1	-0.0538349	0.293905
CUST_927_PI430030029	SaSA53_0580	2	-0.0483282	0.278809
CUST_928_PI430030029	SaSA53_0580	2	-0.158735	0.254422
CUST_929_PI430030029	SaSA53_0581	2	-0.622308	0.708738
CUST_930_PI430030029	SaSA53_0581	2	-0.590264	0.771041
CUST_931_PI430030029	SaSA53_0582	2	-0.49761	0.282577
CUST_932_PI430030029	SaSA53_0582	2	-0.49691	0.286082
CUST_933_PI430030029	SaSA53_0583	2	1.10659	-1.0003
CUST_934_PI430030029	SaSA53_0583	2	0.995655	-1.06368
CUST_935_PI430030029	SaSA53_0584	2	1.00711	-0.983878
CUST_936_PI430030029	SaSA53_0584	2	1.04338	-1.02533
CUST_937_PI430030029	SaSA53_0585	2	0.201107	-0.213552
CUST_938_PI430030029	SaSA53_0585	2	0.1047	-0.151747
CUST_2942_PI430030029	SaSA53_0586	2	-0.184922	0.188751
CUST_2943_PI430030029	SaSA53_0586	2	-0.184243	0.191316
CUST_3145_PI430030029	SaSA53_0586	1	-0.171668	0.25916
CUST_3146_PI430030029	SaSA53_0586	2	-0.0706933	0.0432288
CUST_939_PI430030029	SaSA53_0587	2	0.0289259	-0.0521797
CUST_940_PI430030029	SaSA53_0587	2	-0.0760946	-0.121359
CUST_941_PI430030029	SaSA53_0588	2	-0.252138	0.240489
CUST_942_PI430030029	SaSA53_0588	2	-0.0931028	0.149056
CUST_2944_PI430030029	SaSA53_0589	1	-0.971015	1.04163
CUST_2945_PI430030029	SaSA53_0589	2	-0.938923	0.940758
CUST_3149_PI430030029	SaSA53_0590	2	-0.564874	0.556125
CUST_3150_PI430030029	SaSA53_0590	2	-0.55449	0.605644
CUST_943_PI430030029	SaSA53_0590	2	-0.575808	0.611765
CUST_944_PI430030029	SaSA53_0590	2	-0.588565	0.614021
CUST_945_PI430030029	SaSA53_0591	2	-0.0647993	0.118543
CUST_946_PI430030029	SaSA53_0591	2	-0.0400025	0.217071
CUST_3637_PI430030029	SaSA53_0592	2	-0.451213	0.198612
CUST_3638_PI430030029	SaSA53_0592	2	-0.363929	0.356989
CUST_2946_PI430030029	SaSA53_0593	2	-0.881829	0.693481
CUST_2947_PI430030029	SaSA53_0593	2	-0.708071	0.762299
CUST_2948_PI430030029	SaSA53_0594	2	-0.426182	0.579005
CUST_2949_PI430030029	SaSA53_0594	2	-0.361189	0.557245
CUST_2950_PI430030029	SaSA53_0595	2	-0.394792	0.456729
CUST_2951_PI430030029	SaSA53_0595	2	-0.330788	0.456457
CUST_2952_PI430030029	SaSA53_0596	2	-0.387459	0.240379
CUST_2953_PI430030029	SaSA53_0596	2	-0.4994	0.308541
CUST_3151_PI430030029	SaSA53_0597	2	-0.194241	0.325226
CUST_3152_PI430030029	SaSA53_0597	2	-0.187698	0.15857
CUST_3639_PI430030029	SaSA53_0597	2	-0.162181	0.0777933
CUST_3640_PI430030029	SaSA53_0597	2	-0.0883047	0.138408
CUST_2954_PI430030029	SaSA53_0598	2	0.434886	-0.44586
CUST_2955_PI430030029	SaSA53_0598	2	0.324385	-0.474437
CUST_947_PI430030029	SaSA53_0599	2	-0.0154697	0.00903972
CUST_948_PI430030029	SaSA53_0599	2	-0.0383444	0.0283257
CUST_3641_PI430030029	SaSA53_0600	2	-0.199433	0.0334182
CUST_949_PI430030029	SaSA53_0601	2	0.0603212	-0.0802657
CUST_950_PI430030029	SaSA53_0601	2	0.0800573	-0.0418582
CUST_951_PI430030029	SaSA53_0602	2	0.0724285	-0.0653227
CUST_952_PI430030029	SaSA53_0602	2	0.0777397	-0.0706129
CUST_953_PI430030029	SaSA53_0603	2	0.359081	0.51398
CUST_954_PI430030029	SaSA53_0603	2	-0.049787	0.123786
CUST_957_PI430030029	SaSA53_0604	2	-0.346285	0.449054
CUST_958_PI430030029	SaSA53_0604	2	-0.415422	0.427255
CUST_3153_PI430030029	SaSA53_0605	2	-0.527726	0.239476
CUST_3154_PI430030029	SaSA53_0605	2	-0.365957	0.438506
CUST_959_PI430030029	SaSA53_0606	2	0.24163	-0.478768
CUST_960_PI430030029	SaSA53_0606	2	0.358106	-0.331387
CUST_961_PI430030029	SaSA53_0607	2	0.225368	-0.197032
CUST_962_PI430030029	SaSA53_0607	2	0.294983	-0.163324
CUST_963_PI430030029	SaSA53_0608	2	0.258405	-0.170627
CUST_964_PI430030029	SaSA53_0608	2	0.269409	-0.245165
CUST_965_PI430030029	SaSA53_0609	2	0.26771	-0.082521
CUST_966_PI430030029	SaSA53_0609	2	0.228896	-0.170987
CUST_967_PI430030029	SaSA53_0610	2	0.103723	-0.104812
CUST_968_PI430030029	SaSA53_0610	2	0.0337152	-0.170062
CUST_969_PI430030029	SaSA53_0611	2	0.245019	-0.172683
CUST_970_PI430030029	SaSA53_0611	2	0.278995	-0.11232
CUST_971_PI430030029	SaSA53_0612	2	0.478762	-0.323708
CUST_972_PI430030029	SaSA53_0612	2	0.491707	-0.416102
CUST_973_PI430030029	SaSA53_0613	2	0.366208	-0.541641
CUST_974_PI430030029	SaSA53_0613	2	0.477008	-0.365576
CUST_975_PI430030029	SaSA53_0614	2	0.0567446	-0.137578
CUST_976_PI430030029	SaSA53_0614	2	0.100505	-0.129295
CUST_977_PI430030029	SaSA53_0615	2	0.39069	0.336024
CUST_978_PI430030029	SaSA53_0615	2	-0.111568	-0.139771
CUST_3157_PI430030029	SaSA53_0616	2	-0.0170269	-0.238149
CUST_3158_PI430030029	SaSA53_0616	2	0.0999772	-0.152372
CUST_979_PI430030029	SaSA53_0616	2	0.117604	-0.140732
CUST_980_PI430030029	SaSA53_0616	2	0.160119	-0.154233
CUST_981_PI430030029	SaSA53_0617	2	0.0319707	0.24292
CUST_982_PI430030029	SaSA53_0617	2	-0.378459	0.228929
CUST_983_PI430030029	SaSA53_0618	2	-0.0512385	0.163623
CUST_984_PI430030029	SaSA53_0618	2	-0.201679	0.153106
CUST_985_PI430030029	SaSA53_0619	2	-0.0566025	0.148244
CUST_986_PI430030029	SaSA53_0619	2	-0.0740183	0.0794724
CUST_987_PI430030029	SaSA53_0620	2	-0.194037	0.272871
CUST_2956_PI430030029	SaSA53_0621	2	-0.206978	0.145835
CUST_2957_PI430030029	SaSA53_0621	2	-0.25999	0.0814187
CUST_2958_PI430030029	SaSA53_0622	2	0.390024	-0.230653
CUST_2959_PI430030029	SaSA53_0622	2	0.394105	-0.313936
CUST_988_PI430030029	SaSA53_0623	2	0.266784	-0.169565
CUST_989_PI430030029	SaSA53_0623	2	0.295737	-0.224886
CUST_990_PI430030029	SaSA53_0624	2	-0.413503	0.266647
CUST_991_PI430030029	SaSA53_0624	2	-0.394271	0.302491
CUST_992_PI430030029	SaSA53_0626	2	0.0265673	0.0195982
CUST_993_PI430030029	SaSA53_0626	2	-0.0406062	-0.0287749
CUST_994_PI430030029	SaSA53_0627	2	0.315709	0.00985384
CUST_995_PI430030029	SaSA53_0627	2	0.327274	0.0215926
CUST_996_PI430030029	SaSA53_0628	2	-0.0654883	0.0958098
CUST_997_PI430030029	SaSA53_0628	2	-0.112677	-0.0770079
CUST_998_PI430030029	SaSA53_0629	2	-0.0992807	0.132761
CUST_999_PI430030029	SaSA53_0629	2	-0.00859578	0.115274
CUST_1000_PI430030029	SaSA53_0632	2	-0.14428	-0.0172227
CUST_1001_PI430030029	SaSA53_0632	2	-0.046051	0.0638227
CUST_1002_PI430030029	SaSA53_0633	2	0.485515	-0.420075
CUST_1003_PI430030029	SaSA53_0633	2	0.49839	-0.359692
CUST_1004_PI430030029	SaSA53_0634	2	0.362612	-0.418254
CUST_1005_PI430030029	SaSA53_0634	2	0.315152	-0.315965
CUST_1006_PI430030029	SaSA53_0635	2	0.0403872	-0.117231
CUST_1007_PI430030029	SaSA53_0635	2	0.122365	-0.259
CUST_1008_PI430030029	SaSA53_0636	2	-0.328506	0.284108
CUST_1009_PI430030029	SaSA53_0636	2	-0.456504	0.294245
CUST_1010_PI430030029	SaSA53_0637	2	0.343043	-0.161854
CUST_1011_PI430030029	SaSA53_0637	2	0.0952654	-0.109568
CUST_1012_PI430030029	SaSA53_0638	2	0.231333	-0.18258
CUST_1013_PI430030029	SaSA53_0638	2	0.101897	-0.237914
CUST_1014_PI430030029	SaSA53_0639	2	0.0683131	0.0121617
CUST_1015_PI430030029	SaSA53_0639	2	0.060123	-0.144074
CUST_4114_PI430030029	SaSA53_0641	2	-0.00844113	0.249041
CUST_4115_PI430030029	SaSA53_0641	2	-0.0454779	0.259521
CUST_1016_PI430030029	SaSA53_0642	2	0.328109	0.0392068
CUST_1017_PI430030029	SaSA53_0642	2	0.3966	0.0594913
CUST_1018_PI430030029	SaSA53_0643	2	1.05718	0.649878
CUST_1019_PI430030029	SaSA53_0643	2	0.128377	-0.166895
CUST_1020_PI430030029	SaSA53_0644	2	0.219743	-0.0220626
CUST_1021_PI430030029	SaSA53_0644	2	0.106003	-0.118937
CUST_1022_PI430030029	SaSA53_0645	2	-0.14038	0.113992
CUST_1023_PI430030029	SaSA53_0645	2	-0.11174	0.161441
CUST_1024_PI430030029	SaSA53_0646	2	-0.183149	0.0180284
CUST_1025_PI430030029	SaSA53_0646	2	-0.137879	0.0687296
CUST_1026_PI430030029	SaSA53_0647	2	0.221374	-0.213994
CUST_1027_PI430030029	SaSA53_0647	2	0.209072	-0.182879
CUST_1028_PI430030029	SaSA53_0648	2	0.115389	-0.0766768
CUST_1029_PI430030029	SaSA53_0648	2	0.0783671	-0.129837
CUST_1030_PI430030029	SaSA53_0649	2	0.00789181	-0.0518883
CUST_1031_PI430030029	SaSA53_0649	2	0.0276763	0.000593185
CUST_3160_PI430030029	SaSA53_0649	2	0.13577	-0.0946101
CUST_3643_PI430030029	SaSA53_0650	2	0.255572	-0.21282
CUST_3644_PI430030029	SaSA53_0650	2	0.223634	-0.217914
CUST_1032_PI430030029	SaSA53_0651	2	0.308419	-0.0698312
CUST_1033_PI430030029	SaSA53_0651	2	0.151256	-0.152779
CUST_1034_PI430030029	SaSA53_0652	2	0.0271225	-0.0259574
CUST_1035_PI430030029	SaSA53_0652	2	-0.00291284	-0.110975
CUST_1036_PI430030029	SaSA53_0653	2	0.115605	0.0465902
CUST_1037_PI430030029	SaSA53_0653	2	0.0871887	0.0363983
CUST_1038_PI430030029	SaSA53_0654	2	-0.13589	-0.0950035
CUST_1039_PI430030029	SaSA53_0654	2	-0.0280487	-0.0772325
CUST_1040_PI430030029	SaSA53_0655	2	-0.103128	0.116397
CUST_1041_PI430030029	SaSA53_0655	2	-0.0682246	0.0931943
CUST_1042_PI430030029	SaSA53_0656	2	0.211011	-0.0878579
CUST_1043_PI430030029	SaSA53_0656	2	0.133151	-0.135709
CUST_1044_PI430030029	SaSA53_0657	2	-0.0696088	0.0088617
CUST_1045_PI430030029	SaSA53_0657	2	0.0140292	0.0345758
CUST_1046_PI430030029	SaSA53_0658	2	0.0539939	-0.0806233
CUST_1047_PI430030029	SaSA53_0658	2	0.0211878	-0.1433
CUST_1048_PI430030029	SaSA53_0659	2	0.029856	0.141784
CUST_1049_PI430030029	SaSA53_0659	2	-0.0393696	0.0339282
CUST_1050_PI430030029	SaSA53_0660	2	-0.68462	0.491414
CUST_1051_PI430030029	SaSA53_0660	2	-0.535735	0.568003
CUST_1052_PI430030029	SaSA53_0661	2	-0.0635414	0.111612
CUST_1053_PI430030029	SaSA53_0661	2	-0.170417	0.139823
CUST_1054_PI430030029	SaSA53_0662	2	-0.402041	0.329471
CUST_1055_PI430030029	SaSA53_0662	2	-0.325766	0.329547
CUST_1056_PI430030029	SaSA53_0663	2	-0.0206081	0.0072341
CUST_1057_PI430030029	SaSA53_0663	2	0.148383	0.15989
CUST_3163_PI430030029	SaSA53_0664	2	-0.108247	-0.0412575
CUST_3164_PI430030029	SaSA53_0664	2	0.0235853	0.0753892
CUST_1058_PI430030029	SaSA53_0665	2	-0.109684	0.0889201
CUST_1059_PI430030029	SaSA53_0665	2	-0.231106	0.00705481
CUST_1060_PI430030029	SaSA53_0666	2	-0.260943	0.292418
CUST_1061_PI430030029	SaSA53_0666	2	-0.264175	0.532068
CUST_3645_PI430030029	SaSA53_0667	2	0.317211	-0.0554463
CUST_3646_PI430030029	SaSA53_0667	2	-0.012904	0.64399
CUST_1062_PI430030029	SaSA53_0668	2	0.197558	-0.342844
CUST_1063_PI430030029	SaSA53_0668	2	0.203497	-0.385914
CUST_1064_PI430030029	SaSA53_0669	2	0.255649	-0.29994
CUST_1065_PI430030029	SaSA53_0669	2	0.205077	-0.235774
CUST_1066_PI430030029	SaSA53_0670	2	0.190226	-0.1369
CUST_1067_PI430030029	SaSA53_0670	2	-0.158575	-0.302944
CUST_1068_PI430030029	SaSA53_0671	1	0.554989	-0.0880918
CUST_1069_PI430030029	SaSA53_0671	1	0.336742	-0.150235
CUST_2961_PI430030029	SaSA53_0672	2	-0.022438	-0.178571
CUST_4117_PI430030029	SaSA53_0672	2	0.161359	-0.152017
CUST_1070_PI430030029	SaSA53_0673	2	0.142537	-0.104299
CUST_1071_PI430030029	SaSA53_0673	2	-0.0346346	0.141841
CUST_3647_PI430030029	SaSA53_0673	2	0.177348	-0.0830193
CUST_3648_PI430030029	SaSA53_0673	2	0.153907	-0.0915345
CUST_1072_PI430030029	SaSA53_0674	2	0.0976831	0.189482
CUST_1073_PI430030029	SaSA53_0674	2	0.473896	0.169688
CUST_3165_PI430030029	SaSA53_0675	2	0.0911148	0.0941207
CUST_3166_PI430030029	SaSA53_0675	2	0.232273	-0.267027
CUST_1074_PI430030029	SaSA53_0676	2	0.156749	-0.182869
CUST_1075_PI430030029	SaSA53_0676	2	0.0711983	-0.203107
CUST_2962_PI430030029	SaSA53_0676	2	0.126437	-0.19427
CUST_2963_PI430030029	SaSA53_0676	2	0.137437	-0.160841
CUST_1076_PI430030029	SaSA53_0677	2	0.152459	0.119363
CUST_1077_PI430030029	SaSA53_0677	2	-0.12618	-0.254231
CUST_1078_PI430030029	SaSA53_0678	2	-0.267731	0.222167
CUST_1079_PI430030029	SaSA53_0678	2	-0.297757	0.201539
CUST_1080_PI430030029	SaSA53_0679	2	-0.0297491	0.17359
CUST_1081_PI430030029	SaSA53_0679	2	0.0048631	0.227883
CUST_1082_PI430030029	SaSA53_0680	2	-0.236411	0.159579
CUST_1083_PI430030029	SaSA53_0680	2	-0.109381	0.0923293
CUST_1084_PI430030029	SaSA53_0681	2	-0.050989	0.0401018
CUST_1085_PI430030029	SaSA53_0681	2	-0.116806	0.0635022
CUST_1086_PI430030029	SaSA53_0684	2	0.190112	-0.115451
CUST_1087_PI430030029	SaSA53_0684	2	0.114002	-0.191377
CUST_1088_PI430030029	SaSA53_0685	2	0.251094	0.0791335
CUST_1089_PI430030029	SaSA53_0685	2	0.00668987	0.00165606
CUST_1090_PI430030029	SaSA53_0686	2	0.11479	0.0597105
CUST_1091_PI430030029	SaSA53_0686	2	0.109852	0.0482761
CUST_3649_PI430030029	SaSA53_0687	2	0.315804	-0.322044
CUST_3650_PI430030029	SaSA53_0687	2	0.222797	-0.370733
CUST_3651_PI430030029	SaSA53_0688	2	-0.0568285	0.0157566
CUST_3652_PI430030029	SaSA53_0688	2	-0.118974	0.00504637
CUST_1092_PI430030029	SaSA53_0689	2	-0.154068	-0.000288804
CUST_1093_PI430030029	SaSA53_0689	2	-0.12437	0.117691
CUST_1094_PI430030029	SaSA53_0690	2	0.0965459	-0.204337
CUST_1095_PI430030029	SaSA53_0690	2	0.301145	-0.307994
CUST_1096_PI430030029	SaSA53_0691	2	-0.606657	0.538503
CUST_1097_PI430030029	SaSA53_0691	2	-0.481404	0.40758
CUST_1098_PI430030029	SaSA53_0692	2	0.0306679	-0.119559
CUST_1099_PI430030029	SaSA53_0692	2	0.174253	-0.119431
CUST_1100_PI430030029	SaSA53_0693	2	-0.157575	0.081933
CUST_1101_PI430030029	SaSA53_0693	2	-0.168578	0.129411
CUST_1102_PI430030029	SaSA53_0694	2	-0.013076	0.157618
CUST_1103_PI430030029	SaSA53_0694	2	-0.0956383	-0.0515086
CUST_1104_PI430030029	SaSA53_0695	2	-0.323799	0.34682
CUST_1105_PI430030029	SaSA53_0695	2	-0.340499	0.217665
CUST_1106_PI430030029	SaSA53_0696	2	0.234585	-0.147972
CUST_1107_PI430030029	SaSA53_0696	2	0.266346	-0.155984
CUST_1108_PI430030029	SaSA53_0697	2	0.111114	-0.113602
CUST_1109_PI430030029	SaSA53_0697	2	0.091358	-0.142957
CUST_1110_PI430030029	SaSA53_0698	2	0.235148	-0.150704
CUST_1111_PI430030029	SaSA53_0698	2	0.222177	-0.154706
CUST_1112_PI430030029	SaSA53_0699	2	0.0955965	-0.227662
CUST_1113_PI430030029	SaSA53_0699	2	0.160378	-0.130604
CUST_1114_PI430030029	SaSA53_0700	2	0.321623	-0.283584
CUST_1115_PI430030029	SaSA53_0700	2	0.396817	-0.298483
CUST_1116_PI430030029	SaSA53_0701	2	0.0561899	-0.25977
CUST_1117_PI430030029	SaSA53_0701	2	0.222262	-0.180194
CUST_1119_PI430030029	SaSA53_0702	2	-0.128611	0.049908
CUST_1120_PI430030029	SaSA53_0703	2	0.00323693	-0.0381474
CUST_1121_PI430030029	SaSA53_0703	2	0.089368	-0.236215
CUST_1122_PI430030029	SaSA53_0704	2	0.0541639	-0.1656
CUST_1123_PI430030029	SaSA53_0704	2	0.0197725	-0.110625
CUST_1124_PI430030029	SaSA53_0705	2	0.136803	-0.109013
CUST_4119_PI430030029	SaSA53_0705	2	0.059413	-0.247062
CUST_3653_PI430030029	SaSA53_0706	2	0.0476821	-0.0598736
CUST_3654_PI430030029	SaSA53_0706	2	0.030045	-0.165432
CUST_1125_PI430030029	SaSA53_0707	2	0.0331634	-0.0455421
CUST_1126_PI430030029	SaSA53_0707	2	-0.0117213	-0.0730022
CUST_3169_PI430030029	SaSA53_0708	2	-0.0261499	-0.0477077
CUST_3168_PI430030029	SaSA53_0709	2	0.315944	0.124432
CUST_2964_PI430030029	SaSA53_0710	2	-0.298446	0.0931816
CUST_2965_PI430030029	SaSA53_0710	2	-0.238735	0.107913
CUST_3655_PI430030029	SaSA53_0710	2	-0.269238	0.144711
CUST_3656_PI430030029	SaSA53_0710	2	-0.214762	0.0853117
CUST_1127_PI430030029	SaSA53_0711	2	-0.141764	0.217807
CUST_1128_PI430030029	SaSA53_0711	2	-0.201543	0.185699
CUST_1129_PI430030029	SaSA53_0712	2	-0.203873	0.174112
CUST_1130_PI430030029	SaSA53_0712	2	-0.159286	0.161996
CUST_1131_PI430030029	SaSA53_0713	2	-0.105193	0.203884
CUST_1132_PI430030029	SaSA53_0713	2	-0.385899	-0.0437037
CUST_1133_PI430030029	SaSA53_0714	2	-0.0858738	0.228026
CUST_1134_PI430030029	SaSA53_0714	2	-0.140694	0.278914
CUST_1135_PI430030029	SaSA53_0715	2	-0.534324	0.258851
CUST_1136_PI430030029	SaSA53_0715	2	-0.576542	0.249285
CUST_3170_PI430030029	SaSA53_0716	2	0.188392	-0.0740469
CUST_3171_PI430030029	SaSA53_0716	2	0.156122	-0.177486
CUST_1137_PI430030029	SaSA53_0717	2	0.18257	-0.117503
CUST_1138_PI430030029	SaSA53_0717	2	0.134525	-0.0863447
CUST_1139_PI430030029	SaSA53_0720	2	0.138371	-0.0663233
CUST_1140_PI430030029	SaSA53_0720	2	0.0624321	-0.131994
CUST_1141_PI430030029	SaSA53_0721	2	0.109615	-0.223564
CUST_1142_PI430030029	SaSA53_0721	2	0.156516	-0.160901
CUST_1143_PI430030029	SaSA53_0722	2	0.152446	-0.202929
CUST_1144_PI430030029	SaSA53_0722	2	0.193003	-0.20582
CUST_1145_PI430030029	SaSA53_0723	2	0.104205	-0.0867014
CUST_1146_PI430030029	SaSA53_0723	2	0.191487	-0.178675
CUST_1147_PI430030029	SaSA53_0724	2	0.259104	-0.174067
CUST_1148_PI430030029	SaSA53_0724	2	0.181936	-0.278339
CUST_1149_PI430030029	SaSA53_0725	2	-0.0231349	0.014884
CUST_1150_PI430030029	SaSA53_0725	2	-0.0057319	-0.0394173
CUST_3172_PI430030029	SaSA53_0728	2	-0.299993	0.376376
CUST_3173_PI430030029	SaSA53_0728	2	-0.409013	0.331254
CUST_3657_PI430030029	SaSA53_0729	2	-0.330869	0.490917
CUST_3658_PI430030029	SaSA53_0729	2	-0.431244	0.405197
CUST_4122_PI430030029	SaSA53_0729	2	-0.348642	0.577787
CUST_4123_PI430030029	SaSA53_0729	2	-0.444225	0.414341
CUST_2966_PI430030029	SaSA53_0730	2	-0.278845	0.313127
CUST_2967_PI430030029	SaSA53_0730	2	-0.260982	0.484511
CUST_1151_PI430030029	SaSA53_0731	2	-0.0293533	0.167486
CUST_1152_PI430030029	SaSA53_0731	2	-0.107363	0.111473
CUST_1153_PI430030029	SaSA53_0732	2	0.12675	-0.0688179
CUST_1154_PI430030029	SaSA53_0732	2	0.105654	-0.134222
CUST_1155_PI430030029	SaSA53_0733	2	-0.174763	-0.100713
CUST_1156_PI430030029	SaSA53_0733	2	0.0133688	-8.15392e-05
CUST_1157_PI430030029	SaSA53_0734	2	0.0400391	-0.034193
CUST_1158_PI430030029	SaSA53_0734	2	-0.00544151	0.0591769
CUST_4124_PI430030029	SaSA53_0735	2	0.0127347	0.0952921
CUST_4125_PI430030029	SaSA53_0735	2	-0.197465	-0.17564
CUST_1159_PI430030029	SaSA53_0736	2	-0.133594	-0.143492
CUST_1160_PI430030029	SaSA53_0736	2	0.112645	-0.0569716
CUST_1161_PI430030029	SaSA53_0737	2	-0.0967334	-0.016475
CUST_1162_PI430030029	SaSA53_0737	2	0.0594687	0.00457525
CUST_1163_PI430030029	SaSA53_0738	2	0.00703255	0.042795
CUST_1164_PI430030029	SaSA53_0738	2	0.00344435	0.00732295
CUST_1165_PI430030029	SaSA53_0739	2	0.100921	-0.0663447
CUST_1166_PI430030029	SaSA53_0739	2	0.0333227	0.0201041
CUST_3659_PI430030029	SaSA53_0740	2	0.169908	-0.155937
CUST_3660_PI430030029	SaSA53_0740	2	0.154979	-0.23603
CUST_1167_PI430030029	SaSA53_0741	2	0.15023	-0.0900803
CUST_1168_PI430030029	SaSA53_0741	2	0.186032	-0.14794
CUST_1169_PI430030029	SaSA53_0742	2	0.126831	-0.113962
CUST_1170_PI430030029	SaSA53_0742	2	0.104073	-0.131291
CUST_1171_PI430030029	SaSA53_0743	2	0.0394801	-0.267597
CUST_1172_PI430030029	SaSA53_0743	2	0.0966477	-0.275918
CUST_1173_PI430030029	SaSA53_0744	2	0.0620019	-0.0166472
CUST_1174_PI430030029	SaSA53_0744	2	-0.124734	0.0478503
CUST_1175_PI430030029	SaSA53_0745	2	-0.366495	0.43479
CUST_1176_PI430030029	SaSA53_0745	2	-0.413801	0.256652
CUST_1177_PI430030029	SaSA53_0746	2	0.408283	-0.357046
CUST_1178_PI430030029	SaSA53_0746	2	0.452657	-0.397362
CUST_1179_PI430030029	SaSA53_0747	2	0.270222	-0.383517
CUST_1180_PI430030029	SaSA53_0747	2	0.438936	-0.292942
CUST_3174_PI430030029	SaSA53_0748	2	0.155656	-0.221662
CUST_3175_PI430030029	SaSA53_0748	2	0.326397	-0.218518
CUST_1181_PI430030029	SaSA53_0749	2	0.151077	-0.181087
CUST_1182_PI430030029	SaSA53_0749	2	0.15597	-0.240724
CUST_3176_PI430030029	SaSA53_0749	2	0.111557	-0.223349
CUST_3177_PI430030029	SaSA53_0749	2	0.155643	-0.252748
CUST_3178_PI430030029	SaSA53_0750	2	0.331702	-0.0943956
CUST_3179_PI430030029	SaSA53_0750	2	0.0579176	-0.203155
CUST_3661_PI430030029	SaSA53_0751	2	0.222004	-0.273854
CUST_3180_PI430030029	SaSA53_0752	2	0.154913	-0.0722057
CUST_3181_PI430030029	SaSA53_0752	2	0.199367	-0.0534714
CUST_1183_PI430030029	SaSA53_0753	2	-0.216662	0.221855
CUST_1184_PI430030029	SaSA53_0753	2	-0.234495	0.245585
CUST_1185_PI430030029	SaSA53_0754	2	-0.124954	0.0970451
CUST_1186_PI430030029	SaSA53_0754	2	-0.133325	0.0963524
CUST_1187_PI430030029	SaSA53_0755	2	0.122657	0.100149
CUST_1188_PI430030029	SaSA53_0755	2	-0.0675351	-0.0436528
CUST_1189_PI430030029	SaSA53_0756	2	0.0159337	-0.0318845
CUST_1190_PI430030029	SaSA53_0756	2	0.0593166	-0.0249968
CUST_1191_PI430030029	SaSA53_0757	2	0.0286964	0.0489298
CUST_1192_PI430030029	SaSA53_0757	2	0.0535603	0.0309423
CUST_1193_PI430030029	SaSA53_0758	2	-0.0167955	0.0906877
CUST_1194_PI430030029	SaSA53_0758	2	-0.231517	-0.0907186
CUST_1195_PI430030029	SaSA53_0759	2	-0.0466321	0.12356
CUST_1196_PI430030029	SaSA53_0759	2	-0.0813034	0.0234294
CUST_3182_PI430030029	SaSA53_0760	2	-0.170122	0.20907
CUST_3183_PI430030029	SaSA53_0760	2	-0.153254	0.208457
CUST_1197_PI430030029	SaSA53_0761	2	-0.200021	0.310806
CUST_1198_PI430030029	SaSA53_0761	2	0.217114	0.640839
CUST_1199_PI430030029	SaSA53_0762	2	0.0563059	0.0198879
CUST_1200_PI430030029	SaSA53_0762	2	-0.0218498	-0.0801339
CUST_1201_PI430030029	SaSA53_0763	2	-0.121855	-0.0218291
CUST_1202_PI430030029	SaSA53_0763	2	-0.00422064	0.056529
CUST_1203_PI430030029	SaSA53_0764	2	-0.130829	0.119936
CUST_1204_PI430030029	SaSA53_0764	2	-0.0896572	0.154259
CUST_10_PI430029661	SaSA53_0765	2	0.347143	-0.411074
CUST_11_PI430029661	SaSA53_0765	2	0.344728	-0.419826
CUST_12_PI430029661	SaSA53_0765	2	0.369207	-0.342905
CUST_1205_PI430030029	SaSA53_0765	2	0.370961	-0.367852
CUST_1206_PI430030029	SaSA53_0765	2	0.369556	-0.406916
CUST_1207_PI430030029	SaSA53_0766	2	0.313	-0.294737
CUST_1208_PI430030029	SaSA53_0766	2	0.342428	-0.293384
CUST_1209_PI430030029	SaSA53_0767	2	0.134343	-0.198826
CUST_1210_PI430030029	SaSA53_0767	2	0.0398572	-0.269336
CUST_1211_PI430030029	SaSA53_0768	2	0.0562654	-0.0745517
CUST_1212_PI430030029	SaSA53_0768	2	0.0386346	-0.106947
CUST_1213_PI430030029	SaSA53_0769	2	0.137058	-0.220839
CUST_1214_PI430030029	SaSA53_0769	2	0.242752	-0.140365
CUST_1215_PI430030029	SaSA53_0770	2	0.260408	-0.25947
CUST_1216_PI430030029	SaSA53_0770	2	0.347488	-0.276035
CUST_1217_PI430030029	SaSA53_0771	2	0.19741	-0.101432
CUST_1218_PI430030029	SaSA53_0771	2	0.157815	-0.0474647
CUST_1219_PI430030029	SaSA53_0772	2	0.0741838	0.00871086
CUST_1220_PI430030029	SaSA53_0772	2	-0.0825958	0.0814648
CUST_1221_PI430030029	SaSA53_0773	2	-0.0767004	0.0703994
CUST_1222_PI430030029	SaSA53_0773	2	-0.0550062	0.0065697
CUST_1223_PI430030029	SaSA53_0774	2	-0.144524	0.0930378
CUST_1224_PI430030029	SaSA53_0774	2	-0.037261	0.093688
CUST_1225_PI430030029	SaSA53_0775	2	-0.113992	0.194259
CUST_1226_PI430030029	SaSA53_0775	2	-0.239278	0.132633
CUST_1227_PI430030029	SaSA53_0776	2	-0.0477161	0.0803118
CUST_1228_PI430030029	SaSA53_0776	2	-0.0573546	0.0924355
CUST_1229_PI430030029	SaSA53_0777	2	-0.154378	0.164421
CUST_1230_PI430030029	SaSA53_0777	2	-0.102917	0.158477
CUST_1231_PI430030029	SaSA53_0778	2	-0.441768	0.360067
CUST_1232_PI430030029	SaSA53_0778	2	-0.409468	0.35538
CUST_1233_PI430030029	SaSA53_0779	2	0.30072	-0.0533573
CUST_1234_PI430030029	SaSA53_0779	2	0.251485	-0.111097
CUST_1235_PI430030029	SaSA53_0780	2	0.355899	-0.185736
CUST_1236_PI430030029	SaSA53_0780	2	0.335484	-0.263231
CUST_1237_PI430030029	SaSA53_0781	2	0.182691	-0.255712
CUST_1238_PI430030029	SaSA53_0781	2	0.292802	-0.183475
CUST_1239_PI430030029	SaSA53_0782	2	0.114204	-0.219266
CUST_1240_PI430030029	SaSA53_0782	2	0.0926684	-0.302997
CUST_1241_PI430030029	SaSA53_0783	2	0.0271486	-0.12271
CUST_1242_PI430030029	SaSA53_0783	2	-0.0118917	-0.180349
CUST_1243_PI430030029	SaSA53_0784	2	0.590942	0.331753
CUST_1244_PI430030029	SaSA53_0784	2	0.128124	-0.105456
CUST_3184_PI430030029	SaSA53_0785	2	-0.0912026	0.17495
CUST_3185_PI430030029	SaSA53_0785	2	-0.0984365	0.0930873
CUST_1245_PI430030029	SaSA53_0786	2	0.0660612	-0.28681
CUST_1246_PI430030029	SaSA53_0786	2	0.0751596	-0.268053
CUST_1247_PI430030029	SaSA53_0787	2	0.0413426	-0.245671
CUST_1248_PI430030029	SaSA53_0787	2	0.136563	-0.166559
CUST_1249_PI430030029	SaSA53_0788	2	0.235718	-0.203981
CUST_1250_PI430030029	SaSA53_0788	2	0.33553	-0.170095
CUST_1251_PI430030029	SaSA53_0789	2	0.242082	-0.218295
CUST_1252_PI430030029	SaSA53_0789	2	0.217279	-0.315905
CUST_1253_PI430030029	SaSA53_0790	2	0.0832415	-0.0510836
CUST_1254_PI430030029	SaSA53_0790	2	0.062236	-0.0772115
CUST_1255_PI430030029	SaSA53_0791	2	0.0350534	-0.0204374
CUST_1256_PI430030029	SaSA53_0791	2	-0.0601691	0.0247029
CUST_1257_PI430030029	SaSA53_0792	2	-0.0646421	-0.18033
CUST_1258_PI430030029	SaSA53_0792	2	0.0435317	-0.107027
CUST_1259_PI430030029	SaSA53_0793	2	-0.0685199	-0.144991
CUST_1260_PI430030029	SaSA53_0793	2	0.0436053	-0.122983
CUST_3663_PI430030029	SaSA53_0795	2	-0.0762205	0.0953064
CUST_3664_PI430030029	SaSA53_0795	2	-0.00870101	0.0138812
CUST_1261_PI430030029	SaSA53_0797	2	-0.16586	-0.0512962
CUST_1262_PI430030029	SaSA53_0797	2	-0.332854	-0.125517
CUST_1263_PI430030029	SaSA53_0798	2	-0.110788	0.136276
CUST_1264_PI430030029	SaSA53_0798	2	0.182625	0.406467
CUST_4369_PI430030029	SaSA53_0799	2	-0.0783854	0.229328
CUST_4370_PI430030029	SaSA53_0799	2	-0.211365	0.149421
CUST_4659_PI430030029	SaSA53_0799	2	-0.23395	0.216922
CUST_1265_PI430030029	SaSA53_0800	2	-0.147141	0.271482
CUST_1266_PI430030029	SaSA53_0800	2	-0.0402975	0.216416
CUST_1267_PI430030029	SaSA53_0801	2	-0.512787	0.2975
CUST_1268_PI430030029	SaSA53_0801	2	-0.505163	0.543373
CUST_1269_PI430030029	SaSA53_0802	2	-0.342694	0.0246867
CUST_1270_PI430030029	SaSA53_0802	2	-0.121615	0.0568438
CUST_3186_PI430030029	SaSA53_0802	2	-0.213615	0.0725125
CUST_3187_PI430030029	SaSA53_0802	2	-0.040652	0.264002
CUST_3665_PI430030029	SaSA53_0803	2	-0.0843727	-0.016946
CUST_3666_PI430030029	SaSA53_0803	2	-0.262114	0.0309235
CUST_2968_PI430030029	SaSA53_0804	2	0.0954809	-0.0465743
CUST_2969_PI430030029	SaSA53_0804	2	-0.0295703	-0.125391
CUST_3667_PI430030029	SaSA53_0804	2	0.113304	-0.0606914
CUST_3668_PI430030029	SaSA53_0804	2	0.00142749	-0.102722
CUST_1273_PI430030029	SaSA53_0805	2	0.0247585	0.00332435
CUST_1274_PI430030029	SaSA53_0805	2	-0.0151464	0.0466234
CUST_1275_PI430030029	SaSA53_0806	2	0.0594463	0.192693
CUST_1276_PI430030029	SaSA53_0806	2	-0.152782	0.10281
CUST_1277_PI430030029	SaSA53_0807	2	-0.257259	0.0547476
CUST_1278_PI430030029	SaSA53_0807	2	-0.161157	0.180591
CUST_1279_PI430030029	SaSA53_0808	2	-0.0816224	0.187388
CUST_1280_PI430030029	SaSA53_0808	2	-0.230047	-0.0428686
CUST_1281_PI430030029	SaSA53_0809	2	0.279575	-0.274793
CUST_1282_PI430030029	SaSA53_0809	2	0.16216	-0.205616
CUST_1283_PI430030029	SaSA53_0810	2	-0.023668	-0.260306
CUST_1284_PI430030029	SaSA53_0810	2	0.0921842	-0.181976
CUST_1285_PI430030029	SaSA53_0811	2	0.0423269	-0.0147711
CUST_1286_PI430030029	SaSA53_0811	2	0.0514421	-0.0535707
CUST_1287_PI430030029	SaSA53_0812	2	-0.172554	0.145091
CUST_1288_PI430030029	SaSA53_0812	2	-0.204567	0.169001
CUST_1289_PI430030029	SaSA53_0813	2	0.141574	-0.0974485
CUST_1290_PI430030029	SaSA53_0813	2	0.130117	-0.156342
CUST_1291_PI430030029	SaSA53_0814	2	-0.33495	0.189129
CUST_1292_PI430030029	SaSA53_0814	2	-0.201933	0.19068
CUST_1293_PI430030029	SaSA53_0815	2	0.0372497	-0.233284
CUST_1294_PI430030029	SaSA53_0815	2	-0.0344702	-0.203443
CUST_1295_PI430030029	SaSA53_0816	2	0.13335	-0.256745
CUST_1296_PI430030029	SaSA53_0816	2	0.237103	-0.20223
CUST_1297_PI430030029	SaSA53_0817	2	0.269951	-0.129809
CUST_1298_PI430030029	SaSA53_0817	2	0.252869	-0.183034
CUST_1299_PI430030029	SaSA53_0820	2	-0.130633	0.0958128
CUST_1300_PI430030029	SaSA53_0820	2	-0.17265	-0.0213064
CUST_1301_PI430030029	SaSA53_0821	2	-0.0943624	0.0609956
CUST_1302_PI430030029	SaSA53_0821	2	-0.0305384	0.0815803
CUST_1303_PI430030029	SaSA53_0822	2	0.09268	-0.110236
CUST_1304_PI430030029	SaSA53_0822	2	0.148375	-0.10074
CUST_1305_PI430030029	SaSA53_0823	2	0.248049	-0.0567792
CUST_1306_PI430030029	SaSA53_0823	2	0.142408	-0.168074
CUST_3669_PI430030029	SaSA53_0823	2	0.5856	0.184847
CUST_3670_PI430030029	SaSA53_0823	2	0.11787	-0.189656
CUST_3671_PI430030029	SaSA53_0824	2	-0.0409594	0.0189006
CUST_3672_PI430030029	SaSA53_0824	2	0.0707528	0.0111748
CUST_3188_PI430030029	SaSA53_0825	2	-0.224995	0.156137
CUST_3189_PI430030029	SaSA53_0825	2	-0.222897	0.151914
CUST_3673_PI430030029	SaSA53_0825	2	-0.291524	0.0874457
CUST_3674_PI430030029	SaSA53_0825	2	-0.199515	0.151165
CUST_3190_PI430030029	SaSA53_0826	2	-0.478413	0.382023
CUST_3191_PI430030029	SaSA53_0826	2	-0.376937	0.365522
CUST_1307_PI430030029	SaSA53_0827	2	0.830717	-0.64107
CUST_1308_PI430030029	SaSA53_0827	2	0.560942	-0.509082
CUST_1309_PI430030029	SaSA53_0828	2	0.419147	0.349997
CUST_1310_PI430030029	SaSA53_0828	2	0.0527767	-0.0693029
CUST_1311_PI430030029	SaSA53_0829	2	0.0987042	-0.158768
CUST_1312_PI430030029	SaSA53_0829	2	0.114726	-0.200514
CUST_1313_PI430030029	SaSA53_0830	2	0.0592047	-0.0256713
CUST_1314_PI430030029	SaSA53_0830	2	0.00151078	-0.164501
CUST_1315_PI430030029	SaSA53_0831	2	-0.0602193	0.106447
CUST_1316_PI430030029	SaSA53_0831	2	0.0675901	0.156491
CUST_1317_PI430030029	SaSA53_0832	2	-0.115987	0.0401738
CUST_1318_PI430030029	SaSA53_0832	2	-0.126366	0.160815
CUST_3675_PI430030029	SaSA53_0833	2	-0.246358	0.339923
CUST_3676_PI430030029	SaSA53_0833	2	-0.324406	0.290574
CUST_1319_PI430030029	SaSA53_0834	2	-0.379901	0.0758739
CUST_1320_PI430030029	SaSA53_0834	2	-0.387586	0.0534647
CUST_1321_PI430030029	SaSA53_0835	2	0.0335264	-0.126811
CUST_1322_PI430030029	SaSA53_0835	2	0.0527984	-0.143232
CUST_1323_PI430030029	SaSA53_0836	2	0.0266714	0.03702
CUST_1324_PI430030029	SaSA53_0836	2	0.0852086	-0.0991475
CUST_1325_PI430030029	SaSA53_0837	2	-0.121965	0.0311332
CUST_1326_PI430030029	SaSA53_0837	2	-0.0982704	0.0959037
CUST_1327_PI430030029	SaSA53_0838	2	-0.0123971	0.256993
CUST_1328_PI430030029	SaSA53_0838	2	0.199853	-0.000554403
CUST_4339_PI430030029	SaSA53_0839	2	-0.565603	0.156895
CUST_4340_PI430030029	SaSA53_0839	2	-0.474033	0.219326
CUST_1329_PI430030029	SaSA53_0840	2	-0.182267	-0.180045
CUST_1330_PI430030029	SaSA53_0840	2	-0.0984144	-0.0824108
CUST_1331_PI430030029	SaSA53_0841	2	0.210288	-0.277232
CUST_1332_PI430030029	SaSA53_0841	2	0.201823	-0.142753
CUST_1333_PI430030029	SaSA53_0842	2	0.00973606	-0.0155633
CUST_1334_PI430030029	SaSA53_0842	2	0.084085	-0.0763971
CUST_2970_PI430030029	SaSA53_0843	2	0.185704	-0.355757
CUST_2971_PI430030029	SaSA53_0843	2	0.2545	-0.0999715
CUST_1335_PI430030029	SaSA53_0844	2	0.111616	-0.146993
CUST_1336_PI430030029	SaSA53_0844	2	0.0638412	-0.221348
CUST_1337_PI430030029	SaSA53_0845	2	-0.329178	0.463752
CUST_1338_PI430030029	SaSA53_0845	2	-0.516337	0.242544
CUST_3678_PI430030029	SaSA53_0846	2	-0.107487	0.117353
CUST_1339_PI430030029	SaSA53_0847	2	-0.0672663	-0.0736998
CUST_1340_PI430030029	SaSA53_0847	2	0.00488106	0.0124497
CUST_2972_PI430030029	SaSA53_0848	2	0.0806026	-0.0793053
CUST_2973_PI430030029	SaSA53_0848	2	0.0414252	-0.104628
CUST_1341_PI430030029	SaSA53_0849	2	0.280506	-0.328917
CUST_1342_PI430030029	SaSA53_0849	2	0.129459	-0.444512
CUST_1343_PI430030029	SaSA53_0850	2	0.46885	-0.517386
CUST_1344_PI430030029	SaSA53_0850	2	0.524677	-0.489493
CUST_1345_PI430030029	SaSA53_0851	2	-0.343995	0.183277
CUST_1346_PI430030029	SaSA53_0851	2	-0.190211	0.195427
CUST_1347_PI430030029	SaSA53_0852	2	-0.12026	0.127278
CUST_1348_PI430030029	SaSA53_0852	2	-0.080809	0.169898
CUST_1349_PI430030029	SaSA53_0853	2	-0.261566	0.0815228
CUST_1350_PI430030029	SaSA53_0853	2	-0.237286	0.0386173
CUST_1351_PI430030029	SaSA53_0854	2	-0.194522	0.322672
CUST_1352_PI430030029	SaSA53_0854	2	-0.237686	0.137542
CUST_1353_PI430030029	SaSA53_0855	2	-0.14307	0.127506
CUST_1354_PI430030029	SaSA53_0855	2	-0.197079	0.0451803
CUST_1355_PI430030029	SaSA53_0856	2	-0.0323019	-0.108705
CUST_1356_PI430030029	SaSA53_0856	2	0.00364208	0.035476
CUST_1357_PI430030029	SaSA53_0857	2	0.0777993	-0.135806
CUST_1358_PI430030029	SaSA53_0857	2	0.0936305	-0.123528
CUST_1359_PI430030029	SaSA53_0858	2	0.0296833	-0.235881
CUST_1360_PI430030029	SaSA53_0858	2	0.0857814	-0.198488
CUST_1361_PI430030029	SaSA53_0859	2	0.103793	-0.163249
CUST_1362_PI430030029	SaSA53_0859	2	0.188028	-0.109968
CUST_1363_PI430030029	SaSA53_0860	2	0.501596	-0.495058
CUST_1364_PI430030029	SaSA53_0860	2	0.552407	-0.498439
CUST_3679_PI430030029	SaSA53_0860	2	0.524171	-0.468315
CUST_3680_PI430030029	SaSA53_0860	2	0.550983	-0.499814
CUST_4337_PI430030029	SaSA53_0861	2	0.20529	0.11403
CUST_4338_PI430030029	SaSA53_0861	2	0.262314	-0.156397
CUST_1365_PI430030029	SaSA53_0862	2	0.276382	-0.161208
CUST_1366_PI430030029	SaSA53_0862	2	0.286332	-0.114133
CUST_1367_PI430030029	SaSA53_0863	2	0.199011	-0.160982
CUST_1368_PI430030029	SaSA53_0863	2	0.223323	-0.171359
CUST_1369_PI430030029	SaSA53_0864	2	0.0759263	-0.127627
CUST_1370_PI430030029	SaSA53_0864	2	0.220436	0.0298212
CUST_1371_PI430030029	SaSA53_0865	2	0.286699	0.130042
CUST_1372_PI430030029	SaSA53_0865	2	0.226624	0.0537532
CUST_2974_PI430030029	SaSA53_0866	2	0.0674645	-0.106601
CUST_2975_PI430030029	SaSA53_0866	2	0.300866	0.154835
CUST_1373_PI430030029	SaSA53_0867	2	0.0180484	0.10091
CUST_1374_PI430030029	SaSA53_0867	2	0.355235	0.38416
CUST_3681_PI430030029	SaSA53_0867	2	-0.135212	-0.0325931
CUST_3682_PI430030029	SaSA53_0867	2	0.165548	0.173457
CUST_1375_PI430030029	SaSA53_0868	2	-0.271124	-0.162323
CUST_1376_PI430030029	SaSA53_0868	2	-0.0733193	-0.0563699
CUST_4335_PI430030029	SaSA53_0869	2	-0.129929	0.151305
CUST_4336_PI430030029	SaSA53_0869	2	-0.162917	0.166782
CUST_2976_PI430030029	SaSA53_0870	2	-0.0246256	0.154326
CUST_2977_PI430030029	SaSA53_0870	2	-0.0485633	-0.0712283
CUST_1377_PI430030029	SaSA53_0871	2	0.245217	-0.142193
CUST_1378_PI430030029	SaSA53_0871	2	0.126637	-0.157245
CUST_1379_PI430030029	SaSA53_0872	2	0.0377936	-0.120484
CUST_1380_PI430030029	SaSA53_0872	2	0.121117	-0.0660162
CUST_1381_PI430030029	SaSA53_0873	2	-0.134401	0.0841057
CUST_1382_PI430030029	SaSA53_0873	2	-0.0504514	0.145125
CUST_1383_PI430030029	SaSA53_0874	2	-0.162246	0.151342
CUST_1384_PI430030029	SaSA53_0874	2	-0.309762	0.139668
CUST_1385_PI430030029	SaSA53_0875	2	0.0782328	-0.0638033
CUST_1386_PI430030029	SaSA53_0875	2	0.0101587	-0.0787279
CUST_1387_PI430030029	SaSA53_0876	2	-0.042436	-0.0530411
CUST_1388_PI430030029	SaSA53_0876	2	-0.129292	-0.12697
CUST_1389_PI430030029	SaSA53_0877	2	-0.209241	-0.120838
CUST_1390_PI430030029	SaSA53_0877	2	-0.0725234	-0.136656
CUST_1391_PI430030029	SaSA53_0878	2	0.151901	-0.0158941
CUST_1392_PI430030029	SaSA53_0878	2	0.181862	-0.0700982
CUST_1393_PI430030029	SaSA53_0879	2	0.255839	-0.334391
CUST_1394_PI430030029	SaSA53_0879	2	0.257338	-0.398148
CUST_1395_PI430030029	SaSA53_0880	2	0.185699	-0.186402
CUST_1396_PI430030029	SaSA53_0880	2	0.223797	-0.207791
CUST_2978_PI430030029	SaSA53_0881	2	-0.435026	0.431619
CUST_2979_PI430030029	SaSA53_0881	2	-0.394109	0.239187
CUST_1397_PI430030029	SaSA53_0882	2	0.170854	0.431558
CUST_1398_PI430030029	SaSA53_0882	2	-0.0404436	0.224284
CUST_1399_PI430030029	SaSA53_0883	2	0.00690174	-0.00801849
CUST_1400_PI430030029	SaSA53_0883	2	0.0401553	-0.08956
CUST_1401_PI430030029	SaSA53_0884	2	-0.0124942	-0.102248
CUST_1402_PI430030029	SaSA53_0884	2	0.0399687	-0.166094
CUST_4334_PI430030029	SaSA53_0885	2	0.151719	-0.151579
CUST_1403_PI430030029	SaSA53_0887	2	0.244082	-0.123509
CUST_1404_PI430030029	SaSA53_0887	2	0.28044	-0.179896
CUST_2980_PI430030029	SaSA53_0887	2	0.231845	-0.133536
CUST_2981_PI430030029	SaSA53_0887	2	0.260777	-0.214986
CUST_3192_PI430030029	SaSA53_0887	2	0.210149	-0.160574
CUST_3193_PI430030029	SaSA53_0887	2	0.284341	-0.177291
CUST_4331_PI430030029	SaSA53_0887	2	0.349693	-0.421752
CUST_4660_PI430030029	SaSA53_0887	2	-0.36762	-0.0188435
CUST_3194_PI430030029	SaSA53_0888	2	0.341595	-0.239526
CUST_4329_PI430030029	SaSA53_0888	2	0.485448	-0.124992
CUST_4662_PI430030029	SaSA53_0888	2	-0.631775	-0.150958
CUST_2982_PI430030029	SaSA53_0889	2	0.356438	-0.168899
CUST_2983_PI430030029	SaSA53_0889	2	0.18815	-0.159786
CUST_3195_PI430030029	SaSA53_0889	2	0.209766	-0.227407
CUST_3714_PI430030029	SaSA53_0889	2	0.0391347	0.0956408
CUST_4661_PI430030029	SaSA53_0889	2	-0.403305	-0.136564
CUST_2984_PI430030029	SaSA53_0890	2	0.305165	-0.186266
CUST_2985_PI430030029	SaSA53_0890	2	0.267619	-0.291482
CUST_1405_PI430030029	SaSA53_0891	2	0.52443	-0.25334
CUST_1406_PI430030029	SaSA53_0891	2	0.660905	-0.170109
CUST_1407_PI430030029	SaSA53_0892	2	0.211985	-0.0973711
CUST_1408_PI430030029	SaSA53_0892	2	-0.0151294	-0.067098
CUST_1409_PI430030029	SaSA53_0893	2	-0.171828	0.0823552
CUST_1410_PI430030029	SaSA53_0893	2	-0.219788	0.0206423
CUST_1411_PI430030029	SaSA53_0894	2	-0.402608	0.209466
CUST_1412_PI430030029	SaSA53_0894	2	-0.385341	0.191314
CUST_2986_PI430030029	SaSA53_0895	2	-0.176642	0.369016
CUST_2987_PI430030029	SaSA53_0895	2	-0.0760828	0.152095
CUST_1413_PI430030029	SaSA53_0896	2	-0.026975	0.0510788
CUST_1414_PI430030029	SaSA53_0896	2	-0.143473	-0.0751548
CUST_1415_PI430030029	SaSA53_0897	2	-0.0290775	0.0520137
CUST_1416_PI430030029	SaSA53_0897	2	0.0569897	0.000282288
CUST_1417_PI430030029	SaSA53_0898	2	-0.0652479	0.0134344
CUST_1418_PI430030029	SaSA53_0898	2	0.0166082	0.0419483
CUST_3715_PI430030029	SaSA53_0899	2	-0.202947	0.285691
CUST_3716_PI430030029	SaSA53_0899	2	-0.230666	0.205532
CUST_1419_PI430030029	SaSA53_0900	2	-0.153827	0.289178
CUST_1420_PI430030029	SaSA53_0900	2	-0.128891	0.226121
CUST_1421_PI430030029	SaSA53_0901	2	-0.182117	0.235362
CUST_1422_PI430030029	SaSA53_0901	2	-0.174174	0.187821
CUST_1423_PI430030029	SaSA53_0902	2	0.0466255	-0.121883
CUST_1424_PI430030029	SaSA53_0902	2	0.0408209	-0.0272495
CUST_1425_PI430030029	SaSA53_0903	2	-0.382185	0.554978
CUST_1426_PI430030029	SaSA53_0903	2	-0.281644	0.297786
CUST_3196_PI430030029	SaSA53_0903	2	-0.24511	0.587022
CUST_3197_PI430030029	SaSA53_0903	2	-0.330484	0.339076
CUST_9232_PI430030029	SaSA53_0903	1	-0.614167	0.634127
CUST_9233_PI430030029	SaSA53_0903	2	-0.209157	0.365435
CUST_1427_PI430030029	SaSA53_0904	2	0.0630814	0.120354
CUST_1428_PI430030029	SaSA53_0904	2	-0.17863	0.136507
CUST_1429_PI430030029	SaSA53_0907	2	0.315211	-0.248518
CUST_1430_PI430030029	SaSA53_0907	2	0.22873	-0.259999
CUST_3717_PI430030029	SaSA53_0908	2	0.031812	0.0469624
CUST_3718_PI430030029	SaSA53_0908	2	0.244804	0.221934
CUST_1431_PI430030029	SaSA53_0909	2	-0.0675953	-0.11735
CUST_1432_PI430030029	SaSA53_0909	2	0.0323086	-0.0768585
CUST_2988_PI430030029	SaSA53_0910	2	0.220315	-0.0282305
CUST_2989_PI430030029	SaSA53_0910	2	0.0940571	-0.0939045
CUST_1433_PI430030029	SaSA53_0911	2	0.0212938	-0.0850733
CUST_1434_PI430030029	SaSA53_0911	2	0.0952412	-0.019413
CUST_1435_PI430030029	SaSA53_0912	2	0.242707	-0.157434
CUST_1436_PI430030029	SaSA53_0912	2	0.159956	-0.271719
CUST_3198_PI430030029	SaSA53_0913	2	0.181091	-0.277375
CUST_3199_PI430030029	SaSA53_0913	2	0.331701	-0.195588
CUST_1437_PI430030029	SaSA53_0914	2	0.203994	-0.205466
CUST_1438_PI430030029	SaSA53_0914	2	0.31255	-0.164308
CUST_1439_PI430030029	SaSA53_0915	2	0.424589	-0.316809
CUST_1440_PI430030029	SaSA53_0915	2	0.312237	-0.426556
CUST_1441_PI430030029	SaSA53_0916	2	0.341721	-0.351561
CUST_1442_PI430030029	SaSA53_0916	2	0.338296	-0.451008
CUST_1443_PI430030029	SaSA53_0917	2	0.241896	-0.115383
CUST_1444_PI430030029	SaSA53_0917	2	0.222483	-0.131948
CUST_1445_PI430030029	SaSA53_0918	2	-0.1036	0.115292
CUST_1446_PI430030029	SaSA53_0918	2	-0.212432	0.0638965
CUST_1447_PI430030029	SaSA53_0919	2	-0.639678	0.421651
CUST_1448_PI430030029	SaSA53_0919	2	-0.586511	0.309413
CUST_2990_PI430030029	SaSA53_0920	2	-0.304017	0.586766
CUST_2991_PI430030029	SaSA53_0920	2	-0.354042	0.576183
CUST_3720_PI430030029	SaSA53_0920	2	-0.341166	0.550429
CUST_1449_PI430030029	SaSA53_0921	2	-0.299542	0.321342
CUST_1450_PI430030029	SaSA53_0921	2	-0.292897	0.325655
CUST_1451_PI430030029	SaSA53_0922	2	-0.0878587	0.136047
CUST_1452_PI430030029	SaSA53_0922	2	-0.134943	-0.0242809
CUST_1453_PI430030029	SaSA53_0924	2	-0.136297	0.0372553
CUST_1454_PI430030029	SaSA53_0924	2	0.406873	0.520471
CUST_1455_PI430030029	SaSA53_0925	2	-0.148737	-0.0648991
CUST_1456_PI430030029	SaSA53_0925	2	0.0171771	-0.0463815
CUST_1457_PI430030029	SaSA53_0926	2	-0.0611658	0.00153859
CUST_1458_PI430030029	SaSA53_0926	2	-0.105379	-0.0871921
CUST_1459_PI430030029	SaSA53_0927	2	-0.0575849	-0.0536412
CUST_1460_PI430030029	SaSA53_0927	2	-0.00459496	-0.0371105
CUST_1461_PI430030029	SaSA53_0928	2	0.0368849	-0.0568438
CUST_1462_PI430030029	SaSA53_0928	2	0.121901	-0.044936
CUST_1463_PI430030029	SaSA53_0929	2	-0.175526	0.182921
CUST_1464_PI430030029	SaSA53_0929	2	-0.18216	0.21032
CUST_1465_PI430030029	SaSA53_0930	2	0.67549	-0.390691
CUST_1466_PI430030029	SaSA53_0930	2	0.625267	-0.401773
CUST_1467_PI430030029	SaSA53_0931	2	0.49324	-0.449301
CUST_1468_PI430030029	SaSA53_0931	2	0.727119	-0.352527
CUST_1469_PI430030029	SaSA53_0932	2	0.429837	-0.652058
CUST_1470_PI430030029	SaSA53_0932	2	0.697763	-0.451913
CUST_2992_PI430030029	SaSA53_0932	2	0.39326	-0.65517
CUST_2993_PI430030029	SaSA53_0932	2	0.709183	-0.3996
CUST_3722_PI430030029	SaSA53_0932	2	0.532471	-0.513148
CUST_2994_PI430030029	SaSA53_0933	2	0.1537	-0.39717
CUST_2995_PI430030029	SaSA53_0933	2	0.258777	-0.440348
CUST_1471_PI430030029	SaSA53_0934	2	-0.0609954	0.0152114
CUST_1472_PI430030029	SaSA53_0934	2	0.0439345	0.100787
CUST_1473_PI430030029	SaSA53_0935	2	0.136885	-0.259215
CUST_1474_PI430030029	SaSA53_0935	2	0.0491308	-0.306938
CUST_1475_PI430030029	SaSA53_0936	2	0.516716	-0.486624
CUST_1476_PI430030029	SaSA53_0936	2	0.451736	-0.464037
CUST_2996_PI430030029	SaSA53_0937	2	0.033196	-0.123015
CUST_2997_PI430030029	SaSA53_0937	2	0.069485	-0.0805235
CUST_1477_PI430030029	SaSA53_0938	2	-0.198767	0.135587
CUST_1478_PI430030029	SaSA53_0938	2	-0.090299	0.146629
CUST_3723_PI430030029	SaSA53_0939	2	-0.313898	0.387581
CUST_3724_PI430030029	SaSA53_0939	2	-0.288893	0.411721
CUST_1479_PI430030029	SaSA53_0940	2	-0.0893054	-0.107202
CUST_1480_PI430030029	SaSA53_0940	2	-0.209196	-0.280907
CUST_3202_PI430030029	SaSA53_0941	2	-0.146456	-0.11583
CUST_3203_PI430030029	SaSA53_0941	2	-0.164403	-0.225145
CUST_3725_PI430030029	SaSA53_0941	2	-0.0360141	-0.0408905
CUST_3726_PI430030029	SaSA53_0941	2	-0.143643	-0.208843
CUST_1481_PI430030029	SaSA53_0942	2	-0.0742699	-0.0138067
CUST_1482_PI430030029	SaSA53_0942	2	-0.0195378	0.064287
CUST_1483_PI430030029	SaSA53_0943	2	0.0420569	-0.144653
CUST_1484_PI430030029	SaSA53_0943	2	0.00710106	0.0505584
CUST_1485_PI430030029	SaSA53_0944	2	0.0532614	-0.00111039
CUST_1486_PI430030029	SaSA53_0944	2	-0.0329676	-0.0962178
CUST_1487_PI430030029	SaSA53_0945	2	0.285095	0.180983
CUST_1488_PI430030029	SaSA53_0945	2	-0.0381273	-0.119363
CUST_1489_PI430030029	SaSA53_0946	2	0.437538	-0.386209
CUST_1490_PI430030029	SaSA53_0946	2	0.494719	-0.166636
CUST_1491_PI430030029	SaSA53_0947	2	0.25609	-0.342224
CUST_1492_PI430030029	SaSA53_0947	2	0.39815	-0.239284
CUST_1493_PI430030029	SaSA53_0948	2	0.154443	-0.244943
CUST_1494_PI430030029	SaSA53_0948	2	0.26024	-0.379357
CUST_1495_PI430030029	SaSA53_0949	2	0.0953619	-0.00861565
CUST_1496_PI430030029	SaSA53_0949	2	0.0781108	-0.12037
CUST_1498_PI430030029	SaSA53_0950	2	0.0456614	0.0600216
CUST_1499_PI430030029	SaSA53_0951	2	-0.0720669	0.0359322
CUST_1500_PI430030029	SaSA53_0951	2	-0.0898178	-0.0706979
CUST_3727_PI430030029	SaSA53_0952	2	0.205672	0.0538473
CUST_3728_PI430030029	SaSA53_0952	2	0.283257	0.256126
CUST_1501_PI430030029	SaSA53_0953	2	-0.115443	-0.0268903
CUST_1502_PI430030029	SaSA53_0953	2	-0.175349	-0.0492082
CUST_3204_PI430030029	SaSA53_0954	2	-0.872923	0.757752
CUST_3205_PI430030029	SaSA53_0954	2	-1.18804	1.26812
CUST_1503_PI430030029	SaSA53_0955	2	-1.36302	1.31533
CUST_1504_PI430030029	SaSA53_0955	2	-1.27872	1.28732
CUST_1505_PI430030029	SaSA53_0956	2	-1.38748	1.52996
CUST_1506_PI430030029	SaSA53_0956	2	-1.77799	1.65571
CUST_1507_PI430030029	SaSA53_0957	2	-1.61531	1.37568
CUST_1508_PI430030029	SaSA53_0957	2	-1.43895	1.52762
CUST_4663_PI430030029	SaSA53_0958	2	-0.00906944	-0.0318352
CUST_4664_PI430030029	SaSA53_0958	2	0.0120327	-0.0147018
CUST_1509_PI430030029	SaSA53_0959	2	-0.0430834	-0.000983954
CUST_1510_PI430030029	SaSA53_0959	2	-0.154403	0.0870636
CUST_1511_PI430030029	SaSA53_0960	2	0.062751	-0.237963
CUST_1512_PI430030029	SaSA53_0960	2	0.204534	0.250372
CUST_1513_PI430030029	SaSA53_0961	2	-0.0680084	-0.0466655
CUST_1514_PI430030029	SaSA53_0961	2	0.0283647	0.0230355
CUST_3729_PI430030029	SaSA53_0962	2	0.0269666	-0.00343911
CUST_3730_PI430030029	SaSA53_0962	2	-0.162289	-0.159111
CUST_1515_PI430030029	SaSA53_0965	2	0.119938	-0.197359
CUST_1516_PI430030029	SaSA53_0965	2	0.233912	-0.253821
CUST_3731_PI430030029	SaSA53_0966	2	-0.144127	0.0528811
CUST_3732_PI430030029	SaSA53_0966	2	0.116681	0.16834
CUST_1517_PI430030029	SaSA53_0968	2	-0.0161842	0.18885
CUST_1518_PI430030029	SaSA53_0968	2	-0.0388306	0.262852
CUST_1519_PI430030029	SaSA53_0969	2	-0.0294264	0.0291721
CUST_1520_PI430030029	SaSA53_0969	2	-0.0788487	-0.0816083
CUST_1521_PI430030029	SaSA53_0970	2	-0.0118635	0.187984
CUST_1522_PI430030029	SaSA53_0970	2	0.042462	0.148372
CUST_1523_PI430030029	SaSA53_0971	2	-0.0282432	-0.0493366
CUST_1524_PI430030029	SaSA53_0971	2	0.237506	0.164175
CUST_1525_PI430030029	SaSA53_0972	2	0.121986	-0.144261
CUST_1526_PI430030029	SaSA53_0972	2	0.148151	-0.137322
CUST_1527_PI430030029	SaSA53_0973	2	-0.0146149	0.0751506
CUST_1528_PI430030029	SaSA53_0973	2	-0.112081	-0.102135
CUST_1529_PI430030029	SaSA53_0974	2	-0.0151995	-0.0633849
CUST_1530_PI430030029	SaSA53_0974	2	-0.0337726	-0.116506
CUST_1531_PI430030029	SaSA53_0975	2	0.109775	-0.0935334
CUST_1532_PI430030029	SaSA53_0975	2	-0.0593669	-0.167129
CUST_1533_PI430030029	SaSA53_0976	2	0.0128287	-0.0596213
CUST_1534_PI430030029	SaSA53_0976	2	0.104423	-0.0745549
CUST_1535_PI430030029	SaSA53_0977	2	0.26404	-0.0910179
CUST_1536_PI430030029	SaSA53_0977	2	0.0803056	-0.2437
CUST_1537_PI430030029	SaSA53_0978	2	0.0928726	-0.132869
CUST_1538_PI430030029	SaSA53_0978	2	0.00618887	-0.164185
CUST_1539_PI430030029	SaSA53_0979	2	0.0419898	-0.0600696
CUST_1540_PI430030029	SaSA53_0979	2	0.0397611	-0.0569374
CUST_1541_PI430030029	SaSA53_0980	2	0.0902185	-0.153612
CUST_1542_PI430030029	SaSA53_0980	2	0.110511	-0.276432
CUST_3733_PI430030029	SaSA53_0981	2	-0.241481	0.258812
CUST_3734_PI430030029	SaSA53_0981	2	-0.184733	0.216495
CUST_1543_PI430030029	SaSA53_0982	2	-0.360525	0.507895
CUST_1544_PI430030029	SaSA53_0982	2	-0.374844	0.678193
CUST_3206_PI430030029	SaSA53_0983	2	-0.423391	0.306054
CUST_3207_PI430030029	SaSA53_0983	2	-0.439827	0.19174
CUST_1545_PI430030029	SaSA53_0984	2	-0.249231	0.143711
CUST_1546_PI430030029	SaSA53_0984	2	-0.16323	0.253969
CUST_1548_PI430030029	SaSA53_0985	2	0.0373783	0.0121482
CUST_3737_PI430030029	SaSA53_0986	2	-0.296538	0.348448
CUST_1549_PI430030029	SaSA53_0987	2	0.0185053	-0.0565276
CUST_1550_PI430030029	SaSA53_0987	2	0.0267382	-0.0287593
CUST_3739_PI430030029	SaSA53_0988	2	-0.061947	0.0392253
CUST_3740_PI430030029	SaSA53_0988	2	0.126132	0.0263599
CUST_1551_PI430030029	SaSA53_0989	2	-0.301191	0.181991
CUST_1552_PI430030029	SaSA53_0989	2	-0.135207	-0.0678242
CUST_1553_PI430030029	SaSA53_0993	2	-0.0555355	-0.06345
CUST_1554_PI430030029	SaSA53_0993	2	0.0128123	-0.042222
CUST_1555_PI430030029	SaSA53_0994	2	0.15802	-0.0313999
CUST_1556_PI430030029	SaSA53_0994	2	-0.101785	-0.225326
CUST_1557_PI430030029	SaSA53_0995	2	-0.18499	0.213802
CUST_1558_PI430030029	SaSA53_0995	2	-0.175471	0.187766
CUST_1559_PI430030029	SaSA53_0996	2	-0.128492	0.247482
CUST_1560_PI430030029	SaSA53_0996	2	0.00197792	0.330894
CUST_1561_PI430030029	SaSA53_0997	2	-0.11371	0.182816
CUST_1562_PI430030029	SaSA53_0997	2	-0.0808287	0.126971
CUST_1563_PI430030029	SaSA53_0998	2	-0.140319	0.0696071
CUST_1564_PI430030029	SaSA53_0998	2	-0.120502	0.0382586
CUST_1565_PI430030029	SaSA53_0999	2	-0.191562	0.0264274
CUST_1566_PI430030029	SaSA53_0999	2	-0.123401	0.0858927
CUST_1567_PI430030029	SaSA53_1000	2	-0.0902856	0.122858
CUST_1568_PI430030029	SaSA53_1000	2	-0.176224	0.0445685
CUST_1569_PI430030029	SaSA53_1002	2	0.079701	-0.163664
CUST_1570_PI430030029	SaSA53_1002	2	0.0146416	-0.263586
CUST_1571_PI430030029	SaSA53_1003	2	0.125827	-0.201886
CUST_1572_PI430030029	SaSA53_1003	2	0.145486	-0.200095
CUST_1573_PI430030029	SaSA53_1004	2	0.065726	-0.104903
CUST_1574_PI430030029	SaSA53_1004	2	0.0431442	-0.16408
CUST_1575_PI430030029	SaSA53_1005	2	0.347039	-0.102152
CUST_1576_PI430030029	SaSA53_1005	2	0.385962	-0.067841
CUST_1577_PI430030029	SaSA53_1006	2	-0.352359	0.208653
CUST_1578_PI430030029	SaSA53_1006	2	-0.347966	0.182101
CUST_1579_PI430030029	SaSA53_1007	2	0.139976	-0.254195
CUST_1580_PI430030029	SaSA53_1007	2	0.0943294	-0.183454
CUST_3210_PI430030029	SaSA53_1008	2	0.197331	-0.248387
CUST_3212_PI430030029	SaSA53_1009	2	0.250552	-0.222529
CUST_3213_PI430030029	SaSA53_1009	2	0.228852	-0.25913
CUST_1582_PI430030029	SaSA53_1010	2	0.15484	-0.249698
CUST_1583_PI430030029	SaSA53_1010	2	-0.0922815	-0.2798
CUST_1585_PI430030029	SaSA53_1011	2	0.268031	0.212155
CUST_1586_PI430030029	SaSA53_1011	2	0.133381	-0.113982
CUST_1587_PI430030029	SaSA53_1012	2	0.099381	-0.185232
CUST_1588_PI430030029	SaSA53_1012	2	0.132335	-0.216003
CUST_1589_PI430030029	SaSA53_1013	2	-0.0110809	-0.00562906
CUST_1590_PI430030029	SaSA53_1013	2	0.0419567	0.0403829
CUST_1591_PI430030029	SaSA53_1014	2	0.102587	-0.112333
CUST_1592_PI430030029	SaSA53_1014	2	0.097949	-0.162277
CUST_1593_PI430030029	SaSA53_1015	2	0.680573	0.231089
CUST_1594_PI430030029	SaSA53_1015	2	0.215129	-0.333698
CUST_1595_PI430030029	SaSA53_1018	2	-0.104038	0.135803
CUST_1596_PI430030029	SaSA53_1018	2	-0.139122	0.0616857
CUST_1597_PI430030029	SaSA53_1019	2	-0.201454	0.0976235
CUST_1598_PI430030029	SaSA53_1019	2	-0.197835	0.0453148
CUST_1599_PI430030029	SaSA53_1020	2	0.131324	-0.25173
CUST_1600_PI430030029	SaSA53_1020	2	0.113961	-0.149772
CUST_1601_PI430030029	SaSA53_1021	2	0.136218	-0.192128
CUST_1602_PI430030029	SaSA53_1021	2	0.0493021	-0.277331
CUST_1603_PI430030029	SaSA53_1022	2	0.161782	-0.127253
CUST_1604_PI430030029	SaSA53_1022	2	0.164897	-0.143649
CUST_1605_PI430030029	SaSA53_1023	2	0.00892067	-0.110995
CUST_1606_PI430030029	SaSA53_1023	2	-0.0379246	-0.172059
CUST_1607_PI430030029	SaSA53_1024	2	0.178089	-0.327783
CUST_1608_PI430030029	SaSA53_1024	2	0.161927	-0.389689
CUST_1609_PI430030029	SaSA53_1025	2	-0.165166	-0.208165
CUST_1610_PI430030029	SaSA53_1025	2	-0.123392	-0.187927
CUST_1611_PI430030029	SaSA53_1026	2	0.235008	-0.104314
[truncated: 1,639 more rows]
